# Supplementary material
Source: PubMed Central journal article supplement (PMC7115957)
Supplement: EMS87368-supplement-Supplemental_Material_.pdf [file EMS87368-supplement-Supplemental_Material_.pdf]

## Supplemental Material

Carotid intima-media thickness progression as  
surrogate marker for cardiovascular risk: Meta-analysis of  
119 clinical trials involving 100,667 patients

### Table of Contents

|                                                                                                                          |            |
|--------------------------------------------------------------------------------------------------------------------------|------------|
| <b>Supplemental Methods .....</b>                                                                                        | <b>S2</b>  |
| <b>Supplemental Tables.....</b>                                                                                          | <b>S5</b>  |
| Supplemental Table I. PRISMA-IPD Checklist. ....                                                                         | S5         |
| Supplemental Table II. Sources and searches.....                                                                         | S8         |
| Supplemental Table III. Definition of the primary CVD outcome and methods used<br>to assess cIMT progression.....        | S9         |
| Supplemental Table IV. Intervention effects on progression of individual outcomes and<br>different cIMT types .....      | S12        |
| Supplemental Table V. Full names and links to publications of contributing trials.....                                   | S18        |
| <b>Supplemental Figures .....</b>                                                                                        | <b>S22</b> |
| Supplemental Figure I. PRISMA Flow chart.....                                                                            | S22        |
| Supplemental Figure II. Leave-one out cross-validation analysis showing 95% prediction<br>intervals for each study ..... | S23        |
| <b>Full list of the PROG-IMT and the Proof-ATHERO study groups and<br/>their affiliations .....</b>                      | <b>S24</b> |

## Supplemental Methods

To test whether intervention effects on cardiovascular disease (CVD) risk depended on intervention effects on carotid intima-media thickness (cIMT) progression we used a meta-regression that accounted for the estimated precision in both effects.<sup>14</sup> Specifically, we followed the methods of Daniels and Hughes (1997) as set out below.

In the  $i$ th trial the true treatment difference on the clinical outcome (CVD incidence) is  $\theta_i$  and the true treatment difference on the cIMT progression is  $\gamma_i$ . We have estimates  $\hat{\theta}_i$  and  $\hat{\gamma}_i$  of these quantities from each trial along with estimated standard errors  $\sigma_i$  and  $\delta_i$ . The correlation between  $\hat{\theta}_i$  and  $\hat{\gamma}_i$ , denoted  $\rho_i$ , is estimated using bootstrapping in the trials with individual patient-level data and >30 events as previously described by Riley *et al* in Web Appendix 5 of their paper<sup>15</sup>. The following model is assumed to apply:

$$\begin{pmatrix} \hat{\theta}_i \\ \hat{\gamma}_i \end{pmatrix} \sim N \left( \begin{pmatrix} \theta_i \\ \gamma_i \end{pmatrix}, \begin{pmatrix} \sigma_i^2 & \rho_i \sigma_i \delta_i \\ \rho_i \sigma_i \delta_i & \delta_i^2 \end{pmatrix} \right) \quad (1)$$

$$\theta_i | \gamma_i \sim N(\alpha + \beta \gamma_i, \tau^2) \quad (2)$$

where  $\tau^2$  denotes between-trials heterogeneity in the regression of  $\theta_i$  on  $\gamma_i$ ,  $\alpha$  is an intercept parameter denoting treatment effects on the clinical outcome that do not act through effects on cIMT progression (i.e. indirect effects), and  $\beta$  is the association between treatment differences on cIMT progression and the clinical outcome. A necessary condition for cIMT progression to be a surrogate marker is for  $\beta \neq 0$ . Furthermore, if  $\tau^2 = 0$  then we could predict  $\theta_i$  perfectly from  $\gamma_i$ .

This model is similar to a standard meta-regression model except for one key difference. A standard meta-regression model would consider the estimated treatment effects on cIMT progression as covariates to form the regression  $\theta_i | \hat{\gamma}_i \sim N(\alpha + \beta \hat{\gamma}_i, \tau^2)$ . In contrast, the Daniels and Hughes method allows for the uncertainty in the estimation by assuming a bivariate normal distribution between the two estimated treatment effects. Furthermore, unlike a full bivariate random effects meta-analysis, the Daniels and Hughes model makes no distributional assumption about the true treatment effects on cIMT progression. Further details and a comparison of these modelling approaches have been described by Bujkiewicz *et al*<sup>214</sup>.

## Estimation and Priors

A Bayesian approach was taken to estimate the model parameters and for prediction. Specifically, the following prior distributions were specified for the model parameters:

$$\alpha \sim N(0, 1000)$$

$$\beta \sim N(0, 1000)$$

$$\gamma_i \sim_{iid} N(0, 1000)$$

$$\tau \sim N(0, 100)I(0,)$$

where  $I(0,)$  denotes a positive truncated distribution (i.e.  $\tau$  follows a Half Normal distribution) and *iid* denotes independent and identically distributed.

Sensitivity to the choice of prior distribution for the between-trials variance,  $\tau^2$ , was assessed by using an alternative inverse-Gamma prior,  $\tau^2 \sim IG(0.001, 0.001)$ . Results from the primary model (allowing for a non-zero intercept) were robust to this alternative prior specification; the relative risk (RR) (95% credible interval) per 10  $\mu\text{m}/\text{year}$  slower progression was 0.91 (0.87-0.94) under this alternative specification.

## Prediction

The 95% prediction interval around the regression line (**Figure 1** and **Figure 3**) is derived as follows. Given a true value of cIMT progression,  $\gamma^*$ , the posterior predictive distribution for the log RR for the clinical outcome,  $\theta^*$ , is derived from Equation (2) using MCMC to compute the distribution:

$$f(\theta^*|\gamma^*) \sim N(\alpha + \beta\gamma^*, \tau^2)$$
$$f(\theta^*|\gamma^*) = \sum_{m=1}^M f(\theta^*|\gamma^*, \alpha_{(m)}, \beta_{(m)}, \tau_{(m)}^2)$$

The mean and variance of the predictive distribution can also be derived using the summary statistics from the MCMC run; namely using the posterior means  $\hat{\alpha}$ ,  $\hat{\beta}$ , and  $\widehat{\tau^2}$  and the posterior variances  $s_{\alpha}^2$ ,  $s_{\beta}^2$ , and covariance  $s_{\alpha\beta}$ .

$$E[\theta^*|\gamma^*] = \hat{\alpha} + \hat{\beta}\gamma^*$$

$$\begin{aligned} \text{Var}(\theta^*|\gamma^*) &= E[V(\theta^*|\gamma^*, \alpha, \beta, \tau^2)] + V(E[\theta^*|\gamma^*, \alpha, \beta, \tau^2]) = \\ &= \widehat{\tau^2} + s_\alpha^2 + (\gamma^*)^2 s_\gamma^2 + 2\gamma^* s_{\alpha\beta} \end{aligned}$$

## Leave-one-out predictive validity

Leave-one-out cross-validation was used to assess the predictive validity of the model. Specifically, for each study in turn, the model was re-estimated leaving out the data from that study. A posterior predictive distribution for the left-out study was then obtained for the primary outcome, using information on the estimated cIMT effect,  $\hat{\gamma}_i$ , its variance,  $\delta_i^2$ , and the size of the trial (as obtained from the precision of the clinical outcome,  $\sigma_i^2$ ). The observed RR for the clinical outcome was compared with the 95% prediction interval and estimates outside of the intervals were flagged.

Specifically, the predictive distribution for the estimated intervention effect on CVD incidence (the log RR) for study  $i$  (left-out of analysis) is:

$$(\hat{\theta}_i | \hat{\gamma}_i) \sim N\left(\theta_i + \frac{\sigma_i}{\delta_i} \rho_i (\hat{\gamma}_i - \gamma_i), (1 - \rho_i)^2 \sigma_i^2\right)$$

with  $\theta_i = \alpha + \beta\gamma_i$ . Estimates from this predictive distribution were obtained directly from MCMC samples.

**Figure II in the Supplement** shows results from the leave-one-out cross-validation, where studies have been ordered by the observed precision of the clinical outcome. Only 3 out of the 119 studies (2.5%) fell outside the 95% prediction intervals.

# Supplemental Tables

**Supplemental Table I. PRISMA-IPD Checklist**

| PRISMA-IPD Section/topic                                                                                                            | Item No | Checklist item                                                                                                                                                                                                                                                                                                                                                                                                                                                                                                          | Reported on page                    |
|-------------------------------------------------------------------------------------------------------------------------------------|---------|-------------------------------------------------------------------------------------------------------------------------------------------------------------------------------------------------------------------------------------------------------------------------------------------------------------------------------------------------------------------------------------------------------------------------------------------------------------------------------------------------------------------------|-------------------------------------|
| <b>Title</b>                                                                                                                        |         |                                                                                                                                                                                                                                                                                                                                                                                                                                                                                                                         |                                     |
| Title                                                                                                                               | 1       | Identify the report as a systematic review and meta-analysis of individual participant data.                                                                                                                                                                                                                                                                                                                                                                                                                            | Title page                          |
| <b>Abstract</b>                                                                                                                     |         |                                                                                                                                                                                                                                                                                                                                                                                                                                                                                                                         |                                     |
| Structured summary                                                                                                                  | 2       | Provide a structured summary including as applicable:                                                                                                                                                                                                                                                                                                                                                                                                                                                                   | page 1                              |
|                                                                                                                                     |         | <b>Background:</b> state research question and main objectives, with information on participants, interventions, comparators and outcomes.                                                                                                                                                                                                                                                                                                                                                                              |                                     |
|                                                                                                                                     |         | <b>Methods:</b> report eligibility criteria; data sources including dates of last bibliographic search or elicitation, noting that IPD were sought; methods of assessing risk of bias.                                                                                                                                                                                                                                                                                                                                  |                                     |
|                                                                                                                                     |         | <b>Results:</b> provide number and type of studies and participants identified and number (%) obtained; summary effect estimates for main outcomes (benefits and harms) with confidence intervals and measures of statistical heterogeneity. Describe the direction and size of summary effects in terms meaningful to those who would put findings into practice.                                                                                                                                                      |                                     |
|                                                                                                                                     |         | <b>Discussion:</b> state main strengths and limitations of the evidence, general interpretation of the results and any important implications.                                                                                                                                                                                                                                                                                                                                                                          |                                     |
| <b>Other:</b> report primary funding source, registration number and registry name for the systematic review and IPD meta-analysis. |         |                                                                                                                                                                                                                                                                                                                                                                                                                                                                                                                         |                                     |
| <b>Introduction</b>                                                                                                                 |         |                                                                                                                                                                                                                                                                                                                                                                                                                                                                                                                         |                                     |
| Rationale                                                                                                                           | 3       | Describe the rationale for the review in the context of what is already known.                                                                                                                                                                                                                                                                                                                                                                                                                                          | page 2                              |
| Objectives                                                                                                                          | 4       | Provide an explicit statement of the questions being addressed with reference, as applicable, to participants, interventions, comparisons, outcomes and study design (PICOS). Include any hypotheses that relate to particular types of participant-level subgroups.                                                                                                                                                                                                                                                    | page 2                              |
| <b>Methods</b>                                                                                                                      |         |                                                                                                                                                                                                                                                                                                                                                                                                                                                                                                                         |                                     |
| Protocol and registration                                                                                                           | 5       | Indicate if a protocol exists and where it can be accessed. If available, provide registration information including registration number and registry name. Provide publication details, if applicable.                                                                                                                                                                                                                                                                                                                 | PMID: 20435179                      |
| Eligibility criteria                                                                                                                | 6       | Specify inclusion and exclusion criteria including those relating to participants, interventions, comparisons, outcomes, study design and characteristics (e.g. years when conducted, required minimum follow-up). Note whether these were applied at the study or individual level i.e. whether eligible participants were included (and ineligible participants excluded) from a study that included a wider population than specified by the review inclusion criteria. The rationale for criteria should be stated. | page 3                              |
| Identifying studies - information sources                                                                                           | 7       | Describe all methods of identifying published and unpublished studies including, as applicable: which bibliographic databases were searched with dates of coverage; details of any hand searching including of conference proceedings; use of study registers and agency or company databases; contact with the original research team and experts in the field; open adverts and surveys. Give the date of last search or elicitation.                                                                                 | page 3 & Table II in the Supplement |
| Identifying studies - search                                                                                                        | 8       | Present the full electronic search strategy for at least one database, including any limits used, such that it could be repeated.                                                                                                                                                                                                                                                                                                                                                                                       | Table II in the Supplement          |
| Study selection processes                                                                                                           | 9       | State the process for determining which studies were eligible for inclusion.                                                                                                                                                                                                                                                                                                                                                                                                                                            | page 3 & Figure I in the Supplement |
| Data collection processes                                                                                                           | 10      | Describe how IPD were requested, collected and managed, including any processes for querying and confirming data with investigators. If IPD were not sought from any eligible study, the reason for this should be stated (for each such study).                                                                                                                                                                                                                                                                        | page 3 & Figure I in the Supplement |
|                                                                                                                                     |         | If applicable, describe how any studies for which IPD were not available were dealt with. This should include whether, how and what aggregate data were sought or                                                                                                                                                                                                                                                                                                                                                       |                                     |

|                                                |    |                                                                                                                                                                                                                                                                                                                                                                                                                                                                                                                                                                                                                                                                                                                                                                                                                                                                                                                                                                                                                                   |                                                                                |
|------------------------------------------------|----|-----------------------------------------------------------------------------------------------------------------------------------------------------------------------------------------------------------------------------------------------------------------------------------------------------------------------------------------------------------------------------------------------------------------------------------------------------------------------------------------------------------------------------------------------------------------------------------------------------------------------------------------------------------------------------------------------------------------------------------------------------------------------------------------------------------------------------------------------------------------------------------------------------------------------------------------------------------------------------------------------------------------------------------|--------------------------------------------------------------------------------|
|                                                |    | extracted from study reports and publications (such as extracting data independently in duplicate) and any processes for obtaining and confirming these data with investigators.                                                                                                                                                                                                                                                                                                                                                                                                                                                                                                                                                                                                                                                                                                                                                                                                                                                  |                                                                                |
| Data items                                     | 11 | Describe how the information and variables to be collected were chosen. List and define all study level and participant level data that were sought, including baseline and follow-up information. If applicable, describe methods of standardising or translating variables within the IPD datasets to ensure common scales or measurements across studies.                                                                                                                                                                                                                                                                                                                                                                                                                                                                                                                                                                                                                                                                      | pages 3-4                                                                      |
| IPD integrity                                  | A1 | Describe what aspects of IPD were subject to data checking (such as sequence generation, data consistency and completeness, baseline imbalance) and how this was done.                                                                                                                                                                                                                                                                                                                                                                                                                                                                                                                                                                                                                                                                                                                                                                                                                                                            | page 3                                                                         |
| Risk of bias assessment in individual studies. | 12 | Describe methods used to assess risk of bias in the individual studies and whether this was applied separately for each outcome. If applicable, describe how findings of IPD checking were used to inform the assessment. Report if and how risk of bias assessment was used in any data synthesis.                                                                                                                                                                                                                                                                                                                                                                                                                                                                                                                                                                                                                                                                                                                               | pages 3-4 & Table III in the Supplement                                        |
| Specification of outcomes and effect measures  | 13 | State all treatment comparisons of interests. State all outcomes addressed and define them in detail. State whether they were pre-specified for the review and, if applicable, whether they were primary/main or secondary/additional outcomes. Give the principal measures of effect (such as risk ratio, hazard ratio, difference in means) used for each outcome.                                                                                                                                                                                                                                                                                                                                                                                                                                                                                                                                                                                                                                                              | pages 3-4 & Table 1 & Table III in the Supplement & Table IV in the Supplement |
| Synthesis methods                              | 14 | Describe the meta-analysis methods used to synthesise IPD. Specify any statistical methods and models used. Issues should include (but are not restricted to): <ul style="list-style-type: none"> <li>• Use of a one-stage or two-stage approach.</li> <li>• How effect estimates were generated separately within each study and combined across studies (where applicable).</li> <li>• Specification of one-stage models (where applicable) including how clustering of patients within studies was accounted for.</li> <li>• Use of fixed or random effects models and any other model assumptions, such as proportional hazards.</li> <li>• How (summary) survival curves were generated (where applicable).</li> <li>• Methods for quantifying statistical heterogeneity (such as <math>I^2</math> and <math>\tau^2</math>).</li> <li>• How studies providing IPD and not providing IPD were analysed together (where applicable).</li> <li>• How missing data within the IPD were dealt with (where applicable).</li> </ul> | pages 4-5                                                                      |
| Exploration of variation in effects            | A2 | If applicable, describe any methods used to explore variation in effects by study or participant level characteristics (such as estimation of interactions between effect and covariates). State all participant-level characteristics that were analysed as potential effect modifiers, and whether these were pre-specified.                                                                                                                                                                                                                                                                                                                                                                                                                                                                                                                                                                                                                                                                                                    | pages 4-5                                                                      |
| Risk of bias across studies                    | 15 | Specify any assessment of risk of bias relating to the accumulated body of evidence, including any pertaining to not obtaining IPD for particular studies, outcomes or other variables.                                                                                                                                                                                                                                                                                                                                                                                                                                                                                                                                                                                                                                                                                                                                                                                                                                           | pages 4-5                                                                      |
| Additional analyses                            | 16 | Describe methods of any additional analyses, including sensitivity analyses. State which of these were pre-specified.                                                                                                                                                                                                                                                                                                                                                                                                                                                                                                                                                                                                                                                                                                                                                                                                                                                                                                             | pages 4-5                                                                      |
| <b>Results</b>                                 |    |                                                                                                                                                                                                                                                                                                                                                                                                                                                                                                                                                                                                                                                                                                                                                                                                                                                                                                                                                                                                                                   |                                                                                |
| Study selection and IPD obtained               | 17 | Give numbers of studies screened, assessed for eligibility, and included in the systematic review with reasons for exclusions at each stage. Indicate the number of studies and participants for which IPD were sought and for which IPD were obtained. For those studies where IPD were not available, give the numbers of studies and participants for which aggregate data were available. Report reasons for non-availability of IPD. Include a flow diagram.                                                                                                                                                                                                                                                                                                                                                                                                                                                                                                                                                                 | page 5 & Table 1 & Figure I in the Supplement                                  |
| Study characteristics                          | 18 | For each study, present information on key study and participant characteristics (such as description of interventions, numbers of participants, demographic data, unavailability of outcomes, funding source, and if applicable duration of follow-up). Provide (main) citations for each study. Where applicable, also report similar study characteristics for any studies not providing IPD.                                                                                                                                                                                                                                                                                                                                                                                                                                                                                                                                                                                                                                  | page 5 & Table 1 & Table III in the Supplement & Table V in the Supplement     |
| IPD integrity                                  | A3 | Report any important issues identified in checking IPD or state that there were none.                                                                                                                                                                                                                                                                                                                                                                                                                                                                                                                                                                                                                                                                                                                                                                                                                                                                                                                                             | page 3                                                                         |
| Risk of bias within studies                    | 19 | Present data on risk of bias assessments. If applicable, describe whether data checking led to the up-weighting or down-weighting of these assessments. Consider how any potential bias impacts on the robustness of meta-analysis conclusions.                                                                                                                                                                                                                                                                                                                                                                                                                                                                                                                                                                                                                                                                                                                                                                                   | page 6 & Figure 3 & Figure 4 & Figure II in the Supplement                     |

|                               |    |                                                                                                                                                                                                                                                                                                                                                                                  |                                                                       |
|-------------------------------|----|----------------------------------------------------------------------------------------------------------------------------------------------------------------------------------------------------------------------------------------------------------------------------------------------------------------------------------------------------------------------------------|-----------------------------------------------------------------------|
| Results of individual studies | 20 | For each comparison and for each main outcome (benefit or harm), for each individual study report the number of eligible participants for which data were obtained and show simple summary data for each intervention group (including, where applicable, the number of events), effect estimates and confidence intervals. These may be tabulated or included on a forest plot. | Table 1 & Figure 1 & Table IV in the Supplement                       |
| Results of syntheses          | 21 | Present summary effects for each meta-analysis undertaken, including confidence intervals and measures of statistical heterogeneity. State whether the analysis was pre-specified, and report the numbers of studies and participants and, where applicable, the number of events on which it is based.                                                                          | pages 5-6 & Figure 1 & Figure 2 & Figure 3 & Figure 4                 |
|                               |    | When exploring variation in effects due to patient or study characteristics, present summary interaction estimates for each characteristic examined, including confidence intervals and measures of statistical heterogeneity. State whether the analysis was pre-specified. State whether any interaction is consistent across trials.                                          |                                                                       |
|                               |    | Provide a description of the direction and size of effect in terms meaningful to those who would put findings into practice.                                                                                                                                                                                                                                                     |                                                                       |
| Risk of bias across studies   | 22 | Present results of any assessment of risk of bias relating to the accumulated body of evidence, including any pertaining to the availability and representativeness of available studies, outcomes or other variables.                                                                                                                                                           | page 6 & Figure 2 & Figure 3 & Figure 4 & Figure II in the Supplement |
| Additional analyses           | 23 | Give results of any additional analyses (e.g. sensitivity analyses). If applicable, this should also include any analyses that incorporate aggregate data for studies that do not have IPD. If applicable, summarise the main meta-analysis results following the inclusion or exclusion of studies for which IPD were not available.                                            | page 6 & Figure 3 & Figure 4                                          |
| <b>Discussion</b>             |    |                                                                                                                                                                                                                                                                                                                                                                                  |                                                                       |
| Summary of evidence           | 24 | Summarise the main findings, including the strength of evidence for each main outcome.                                                                                                                                                                                                                                                                                           | page 6                                                                |
| Strengths and limitations     | 25 | Discuss any important strengths and limitations of the evidence including the benefits of access to IPD and any limitations arising from IPD that were not available.                                                                                                                                                                                                            | page 9                                                                |
| Conclusions                   | 26 | Provide a general interpretation of the findings in the context of other evidence.                                                                                                                                                                                                                                                                                               | pages 7-9                                                             |
| Implications                  | A4 | Consider relevance to key groups (such as policy makers, service providers and service users). Consider implications for future research.                                                                                                                                                                                                                                        | pages 7-9                                                             |
| <b>Funding</b>                |    |                                                                                                                                                                                                                                                                                                                                                                                  |                                                                       |
| Funding                       | 27 | Describe sources of funding and other support (such as supply of IPD), and the role in the systematic review of those providing such support.                                                                                                                                                                                                                                    | page 10                                                               |

© Reproduced with permission of the PRISMA IPD Group, which encourages sharing and reuse for non-commercial purpose

## Supplemental Table II. Sources and searches

| Name                      | Full name, URL                                                                                                                                                                                                                                    | Search syntax                                                                                                                                 |
|---------------------------|---------------------------------------------------------------------------------------------------------------------------------------------------------------------------------------------------------------------------------------------------|-----------------------------------------------------------------------------------------------------------------------------------------------|
| <b>Clinicaltrials.gov</b> | Clinicaltrials.gov, <a href="https://clinicaltrials.gov/">https://clinicaltrials.gov/</a>                                                                                                                                                         | - Intima media thickness                                                                                                                      |
| <b>MedPilot</b>           | MedPilot, <a href="https://www.medpilot.de/">https://www.medpilot.de/</a> [this portal went offline in 2015]                                                                                                                                      | - Intima media thickening<br>(intima AND media) AND (thickening OR thickness OR mortality OR death OR stroke OR (myocardial AND infarction))  |
| <b>Cochrane</b>           | Cochrane Library, <a href="http://onlinelibrary.wiley.com/cochranelibrary/search">http://onlinelibrary.wiley.com/cochranelibrary/search</a>                                                                                                       | - Intima media thickness<br>- Intima media thickening                                                                                         |
| <b>Embase</b>             | Embase®, <a href="https://www.embase.com">https://www.embase.com</a>                                                                                                                                                                              | - Intima media thickness<br>- Intima media thickening                                                                                         |
| <b>EU CTR</b>             | EU Clinical Trials Register, <a href="https://www.clinicaltrialsregister.eu/ctr-search/search">https://www.clinicaltrialsregister.eu/ctr-search/search</a>                                                                                        | - Intima media thickness<br>- Intima media thickening                                                                                         |
| <b>ISI</b>                | Web of knowledge, <a href="http://login.webofknowledge.com">http://login.webofknowledge.com</a>                                                                                                                                                   | (1: Topic=(controlled trial);<br>2: Topic=(carotid intima media); 3: Topic=(carotid atherosclerosis) 4: #3 OR #2; 5: #4 AND #1 )              |
| <b>mRCT</b>               | metaRegister of Controlled Trials, <a href="http://www.isrctn.com/page/mrct">http://www.isrctn.com/page/mrct</a>                                                                                                                                  | - Intima media thickness<br>- Intima media thickening                                                                                         |
| <b>PMC</b>                | NCBI PubMed.gov Central, <a href="https://www.ncbi.nlm.nih.gov/pmc/">https://www.ncbi.nlm.nih.gov/pmc/</a>                                                                                                                                        | - Intima media myocardial infarction RCT<br>- Intima media stroke RCT<br>- Intima media death RCT<br>- Intima media mortality RCT             |
| <b>PubMed</b>             | NCBI PubMed.gov, <a href="https://www.ncbi.nlm.nih.gov/pubmed/">https://www.ncbi.nlm.nih.gov/pubmed/</a>                                                                                                                                          | ((carotid intima media) OR (carotid atherosclerosis)) AND ("Controlled Clinical Trials as Topic"[Mesh] OR "Clinical Trial"[Publication Type]) |
| <b>Reference</b>          | References found cited in other studies and review publications on intima-media thickness                                                                                                                                                         | Not applicable                                                                                                                                |
| <b>WHO</b>                | World Health Organization International Clinical Trials Registry Platform, <a href="http://apps.who.int/trialsearch/">http://apps.who.int/trialsearch/</a>                                                                                        | - Intima media thickness<br>- Intima media thickening                                                                                         |
| <b>ISRCTN</b>             | ISRCTN registry, <a href="http://www.isrctn.com/">http://www.isrctn.com/</a>                                                                                                                                                                      | - Intima media thickness<br>- Intima media thickening                                                                                         |
| <b>ANZCTR</b>             | Australian New Zealand Clinical Trials Registry, <a href="http://www.anzctr.org.au/">http://www.anzctr.org.au/</a>                                                                                                                                | - Intima media thickness<br>- Intima media thickening                                                                                         |
| <b>CHICTR</b>             | Chinese Clinical Trial Registry, <a href="http://www.chictr.org.cn/enIndex.aspx">http://www.chictr.org.cn/enIndex.aspx</a>                                                                                                                        | - Intima media thickness<br>- Intima media thickening                                                                                         |
| <b>NTR</b>                | Netherlands Trial Register, <a href="https://www.trialregister.nl/trials">https://www.trialregister.nl/trials</a>                                                                                                                                 | - Intima media thickness<br>- Intima media thickening                                                                                         |
| <b>UMIN-CTR</b>           | UMIN Clinical Trials Registry, <a href="https://upload.umin.ac.jp/cgi-open-bin/ctr_e/index.cgi?function=02">https://upload.umin.ac.jp/cgi-open-bin/ctr_e/index.cgi?function=02</a>                                                                | - Intima media thickness<br>- Intima media thickening                                                                                         |
| <b>IFPMA</b>              | IFPMA Clinical Trials Portal, <a href="http://clinicaltrials.ifpma.org/clinicaltrials/en/myportal/index.htm">http://clinicaltrials.ifpma.org/clinicaltrials/en/myportal/index.htm</a><br>[these links became nonfunctional between 2014 and 2018] | - Intima media thickness<br>- Intima media thickening                                                                                         |



**Supplemental Table III. Definition of the primary CVD outcome and methods used to assess cIMT progression**

| Trial            | Primary outcome definition |        |                   |           |                     | Other | Types of cIMT available   | Assessment of cIMT progression |          |            |           |                                    |
|------------------|----------------------------|--------|-------------------|-----------|---------------------|-------|---------------------------|--------------------------------|----------|------------|-----------|------------------------------------|
|                  | MI                         | Stroke | Revascularization | Fatal CVD | All-cause mortality |       |                           | Near wall                      | Far wall | Right side | Left side | Analyzed with a linear-mixed model |
| ACAPS            | ●                          | ●      | -                 | ●         | -                   |       | meanmax CCA               | ●                              | ●        | ●          | ●         | ●                                  |
| ACT NOW          | ●                          | ●      | ●                 | ●         | -                   |       | meanmean CCA              | -                              | ●        | ●          | -         | ●                                  |
| ALLO-IMT         | ●                          | ●*     | -                 | ●         | -                   |       | meanmean CCA, meanmax CCA | ●                              | ●        | ●          | ●         | ●                                  |
| AMAR             | ●                          | ●      | -                 | ●         | -                   |       | meanmean CCA              | -                              | ●        | ●          | ●         | -                                  |
| ARBITER          | ●                          | ●      | ●                 | ●         | -                   |       | meanmean CCA, meanmax CCA | -                              | ●        | ●          | ●         | -                                  |
| ARBITER 2        | ●                          | ●      | ●                 | -         | ●                   | PVD   | meanmean CCA              | -                              | ●        | ●          | ●         | -                                  |
| ARBITER 6-HALTS  | ●                          | -      | ●                 | ●         | -                   |       | meanmean CCA, meanmax CCA | -                              | ●        | ●          | ●         | -                                  |
| ARTSTIFF         | ●                          | ●      | -                 | ●         | -                   |       | meanmean CCA              | -                              | ●        | ●          | -         | -                                  |
| ASAP-FINLAND     | -                          | -      | -                 | -         | ●                   |       | meanmean CCA              | -                              | ●        | ●          | ●         | -                                  |
| ASAP-NL          | ●                          | ●      | -                 | ●         | -                   |       | meanmean CCA              | ●                              | ●        | ●          | ●         | -                                  |
| ASFAST           | ●                          | ●      | -                 | ●         | -                   |       | meanmax CCA               | -                              | ●        | ●          | ●         | ●                                  |
| ATIC             | ●                          | ●      | -                 | ●         | -                   |       | meanmean CCA              | -                              | ●        | ●          | -         | ●                                  |
| Ahn et al.       | ●                          | ●      | ●                 | -         | ●                   |       | meanmax CCA+BIF+ICA       | ●                              | ●        | ●          | ●         | -                                  |
| Andrews et al.   | ●                          | ●      | -                 | ●         | -                   |       | meanmean CCA              | -                              | ●        | -          | -         | ●                                  |
| BCAPS            | ●                          | ●      | -                 | ●         | -                   |       | meanmean CCA              | -                              | ●        | ●          | -         | -                                  |
| BKREGISTRY-II    | ●                          | ●      | -                 | ●         | -                   |       | meanmean CCA              | -                              | ●        | -          | ●         | ●                                  |
| BVAIT            | -                          | -      | -                 | -         | -                   | CVD   | meanmean CCA              | -                              | ●        | ●          | -         | ●                                  |
| CAIUS            | ●                          | ●      | ●                 | ●         | -                   |       | meanmax CCA               | ●                              | ●        | ●          | ●         | ●                                  |
| CAMERA           | ●†                         | ●      | ●                 | ●         | -                   |       | meanmean CCA              | -                              | ●        | ●          | ●         | ●                                  |
| CAPPA            | ●†                         | ●      | -                 | ●         | -                   |       | meanmean CCA, meanmax CCA | -                              | ●        | ●          | -         | ●                                  |
| CAPTIVATE        | ●                          | ●      | ●                 | ●         | -                   |       | meanmean CCA+BIF+ICA      | ●                              | ●        | ●          | ●         | -                                  |
| CERDIA           | ●                          | ●      | -                 | ●         | -                   |       | meanmean CCA, meanmax CCA | ●                              | ●        | ●          | -         | ●                                  |
| CHICAGO          | ●                          | ●      | ●                 | ●         | -                   |       | meanmean CCA, meanmax CCA | -                              | ●        | ●          | ●         | -                                  |
| CIMT phase 1     | -                          | -      | -                 | -         | ●                   | CVD   | meanmean CCA, meanmax CCA | -                              | ●        | ●          | ●         | -                                  |
| CLAS             | ●                          | -      | ●                 | ●         | -                   |       | meanmean CCA              | -                              | ●        | ●          | -         | -                                  |
| CONTRAST         | ●†                         | ●      | ●                 | ●         | -                   |       | meanmean CCA, meanmax CCA | ●                              | ●        | ●          | ●         | ●                                  |
| Cao et al.       | ●                          | ●      | ●                 | ●         | -                   |       | meanmax CCA+BIF+ICA       | ●                              | ●        | ●          | ●         | -                                  |
| DAPC             | ●                          | ●      | -                 | ●         | -                   |       | meanmean CCA, meanmax CCA | -                              | ●        | -          | ●         | ●                                  |
| DAPHNE           | ●                          | ●      | ●                 | ●         | -                   |       | meanmean CCA+BIF+ICA      | ●                              | ●        | ●          | ●         | ●                                  |
| DOIT             | -                          | -      | -                 | -         | -                   | CVD   | meanmean CCA              | -                              | ●        | -          | -         | -                                  |
| EGE STUDY        | -                          | -      | -                 | ●         | -                   |       | meanmean CCA              | -                              | ●        | ●          | ●         | ●                                  |
| ELITE (early MP) | ●                          | ●      | -                 | ●         | -                   |       | meanmean CCA              | -                              | ●        | ●          | -         | ●                                  |
| ELITE (late MP)  | ●                          | ●      | -                 | ●         | -                   |       | meanmean CCA              | -                              | ●        | ●          | -         | ●                                  |
| ELSA             | ●                          | ●      | -                 | ●         | -                   |       | meanmax CCA+BIF+ICA       | -                              | ●        | ●          | ●         | ●                                  |
| ELVA             | ●                          | ●      | -                 | ●         | -                   |       | meanmean CCA              | -                              | ●        | ●          | -         | -                                  |
| ENCORE           | -                          | ●      | -                 | -         | -                   |       | meanmean CCA              | ●                              | ●        | ●          | ●         | ●                                  |
| ENHANCE          | ●                          | ●      | ●                 | ●         | -                   |       | meanmean CCA, meanmax CCA | -                              | ●        | ●          | ●         | ●                                  |
| EPAT             | ●                          | ●      | ●                 | ●         | -                   |       | meanmean CCA              | -                              | ●        | ●          | -         | ●                                  |
| FIELD            | ●                          | ●      | ●                 | ●         | -                   |       | meanmax CCA               | ●                              | ●        | ●          | ●         | -                                  |
| FIRST            | ●                          | ●      | ●                 | ●         | -                   | HF    | meanmax CCA               | -                              | ●        | ●          | ●         | ●                                  |
| FRANCIS          | ●                          | ●      | ●                 | ●         | -                   |       | meanmean CCA              | -                              | ●        | ●          | ●         | ●                                  |
| GRACE            | ●‡                         | ●      | ●                 | ●         | -                   |       | meanmean CCA, meanmax CCA | ●                              | ●        | ●          | ●         | ●                                  |
| Gresele et al.   | ●‡                         | ●      | -                 | ●         | -                   |       | meanmean CCA, meanmax CCA | ●                              | -        | ●          | -         | ●                                  |
| HART             | ●                          | ●      | -                 | ●         | -                   |       | meanmean CCA, meanmax CCA | ●                              | ●        | ●          | ●         | ●                                  |
| HERS             | ●                          | ●*     | -                 | ●         | -                   |       | meanmax CCA               | ●                              | ●        | ●          | ●         | ●                                  |
| HYRIM            | ●†                         | ●      | -                 | ●         | -                   |       | meanmax CCA               | -                              | ●        | ●          | -         | ●                                  |
| INSIGHT          | ●                          | ●      | -                 | ●         | -                   |       | meanmean CCA              | -                              | ●        | ●          | -         | -                                  |

|                        |            |         |                           |           |
|------------------------|------------|---------|---------------------------|-----------|
| J-STARS                | ● ●* - - ● |         | meanmean CCA              | - ● ● ● ● |
| JART                   | ● ● ● - ●  |         | meanmean CCA, meanmax CCA | - ● ● ● - |
| KAPS                   | ● ● ● ● -  |         | meanmax CCA               | - ● ● ● - |
| KEEPS                  | ● ● - ● -  |         | meanmean CCA              | - ● ● ● ● |
| KIMVASC                | ● ● - ● -  |         | meanmean CCA              | - ● ● ● ● |
| Katakami et al.        | - - - - -  | CVD     | maxmeanmax CCA+BIF+ICA    | ● ● ● ● - |
| Koyasu et al.          | ● ● - ● -  |         | meanmax CCA               | ● - ● ● - |
| LAARS                  | ● ● - ● -  |         | meanmean CCA              | - ● ● ● - |
| LIFE-ICARUS            | ●‡ ● ● ● - |         | meanmean CCA              | - ● ● ● ● |
| LIPID                  | ● ● ● ● -  |         | meanmean CCA              | - ● ● - - |
| Luijendijk et al.      | ● ● - ● -  |         | meanmean CCA              | ● - ● ● - |
| MARS                   | ● ● ● ● -  |         | meanmean CCA              | ● ● ● - - |
| MAVET                  | - - - ● -  |         | meanmax CCA               | - ● ● - ● |
| MECANO                 | ● ● ● ● -  |         | meanmean CCA              | ● - ● ● ● |
| MEDICLAS               | ● ● - ● -  |         | meanmean CCA              | ● ● ● - ● |
| METEOR                 | ● ●§ - ● - |         | meanmean CCA, meanmax CCA | ● ● ● ● ● |
| MG600                  | ● ● - ● -  |         | meanmean CCA, meanmax CCA | ● ● ● ● ● |
| MIDAS                  | ● ● ● ● -  |         | meanmax CCA               | ● ● ● ● - |
| MITEC                  | - - - ● -  |         | meanmean CCA              | - ● ● ● - |
| Makimura et al.        | ● ● - ● -  |         | meanmean CCA              | ● - ● - ● |
| Masia et al.           | ●‡ ● ● ● - |         | meanmean CCA, meanmax CCA | - ● ● ● ● |
| Mitsuhashi et al.      | ● ● - ● -  |         | maxmeanmax CCA+BIF+ICA    | ● ● ● ● - |
| Mortazavi et al.       | - ● - - ●  |         | meanmean CCA              | - ● ● ● - |
| NTPP                   | ● ● - ● -  |         | meanmean CCA, meanmax CCA | ● - ● ● - |
| Nakamura et al. II     | ● ● - ● -  |         | meanmean CCA, meanmax CCA | - ● ● ● ● |
| Ntaios et al.          | ● ●* - ● - |         | meanmean CCA              | ● ● ● ● ● |
| OPAL                   | ●† ● - - - |         | meanmean CCA, meanmax CCA | ● ● ● ● ● |
| PART-2                 | ● ● - ● -  | HF      | meanmean CCA              | - ● ● ● - |
| PEACE                  | ● - - - ●  |         | meanmean CCA, meanmax CCA | ● ● ● ● - |
| PERFORM                | ● ● ● ● -  |         | meanmean CCA              | - ● ● ● ● |
| PERIOCARDIO            | - - - - -  | CVD     | meanmean CCA, meanmax CCA | - ● ● ● ● |
| PHOREA                 | ● ● - ● -  |         | meanmax CCA               | - ● ● ● - |
| PHYLLIS                | ● ● - ● -  |         | meanmax CCA               | ● ● ● ● - |
| PLAC II                | ● - - ● -  |         | meanmax CCA               | ● ● ● ● ● |
| PPAR                   | ● ● - - ●  |         | meanmean CCA+BIF+ICA      | ● - ● ● ● |
| PREDIMED               | ● ● - ● -  |         | meanmean CCA, meanmax CCA | - ● ● ● - |
| PREVEND IT             | ●† ● ● ● - |         | meanmean CCA              | - ● - ● ● |
| PREVENT                | ● ● ● ● -  |         | meanmax CCA               | ● ● ● ● ● |
| PROBE                  | ● ● - - ●  |         | meanmean CCA, meanmax CCA | - ● ● ● - |
| RADIANCE I             | ●† ● - - - |         | meanmean CCA, meanmax CCA | ● ● ● ● ● |
| RADIANCE II            | ●† ● - - - |         | meanmean CCA, meanmax CCA | ● ● ● ● ● |
| RAS                    | ● ● - - ●  |         | meanmean CCA              | - ● ● - - |
| REGRESS                | ● ●* ● - ● |         | meanmean CCA              | - ● ● - - |
| REMOVAL                | ● ● ● ● -  |         | meanmean CCA, meanmax CCA | - ● ● ● ● |
| RIS                    | ● ● - ● -  |         | meanmean CCA, meanmax CCA | - ● ● - ● |
| SANDS                  | ● ● ● ● -  |         | meanmean CCA              | - ● ● ● - |
| SCIMO                  | ● ● ● ● -  |         | meanmax CCA               | - ● ● ● - |
| SECURE                 | ● ● - ● -  |         | meanmax CCA               | ● ● ● ● ● |
| SEKONA                 | ● ● - - ●  |         | meanmean CCA              | - ● ● ● - |
| SENDCAP                | ● - - - -  |         | meanmax CCA               | - ● ● ● - |
| SPEAD-A                | ● ● - ● -  |         | meanmean CCA, meanmax CCA | ● - ● ● ● |
| SPIKE                  | ● ● - - ●  |         | meanmean CCA              | ● - ● ● ● |
| STARR                  | ●‡ ● - ● - |         | meanmean CCA, meanmax CCA | ● ● ● ● ● |
| STOP-NIDDM             | ●‡ ● ● ● - | HF, PVD | meanmean CCA              | - ● ● ● - |
| Safarova et al.        | ● ● ● ● -  |         | meanmean CCA              | - ● ● ● ● |
| Sander et al. (Cp neg) | ● ● - ● -  |         | meanmean CCA              | - ● ● ● - |
| Sander et al. (Cp pos) | ● ● - ● -  |         | meanmean CCA              | - ● ● ● - |
| Spring et al.          | ● ● - ● -  |         | meanmean CCA              | ● ● ● ● - |
| Stanley et al.         | ● ● - ● -  |         | meanmean CCA              | - ● - ● - |

|                |            |                     |           |
|----------------|------------|---------------------|-----------|
| Stanton et al. | ● ● - ● -  | meanmean CCA        | - ● ● ● - |
| TART           | ● ● - ● -  | meanmean CCA        | - ● ● - ● |
| TEAAM          | ● ● - ● -  | meanmean CCA        | - ● ● ● ● |
| TRIPOD         | ● ● - ● -  | meanmean CCA        | - ● ● - ● |
| Tasic et al.   | ● ● - ● -  | meanmean CCA        | - ● ● ● - |
| VEAPS          | ● ●* ● ● - | meanmean CCA        | - ● ● - ● |
| VHAS           | ● ● ● ● -  | meanmax CCA+BIF+ICA | - ● ● ● - |
| VIP            | ● ● - - ●  | meanmean CCA        | - ● ● ● ● |
| VITAL          | ●† ● ● ● - | meanmean CCA        | - ● ● - ● |
| WISH           | ● ● - ● -  | meanmean CCA        | - ● ● - ● |
| Yang et al.    | ● ● ● ● -  | meanmax CCA+BIF+ICA | ● ● ● ● ● |
| Yun et al.     | ● ● - ● -  | meanmean CCA        | ● - ● ● - |
| Zou et al.     | ● ● - ● -  | meanmean CCA        | ● ● ● ● - |

\*includes transient ischemic attack. †includes coronary heart disease. ‡includes stable angina pectoris. §ischemic stroke. Abbreviations: BIF=cIMT measured at the carotid bifurcation. cIMT=carotid intima-media thickness. CCA=cIMT measured at the common-carotid-artery. CVD=cardiovascular disease. HF=heart failure. ICA=cIMT measured at the internal-carotid-artery. MI=myocardial infarction. PVD=peripheral vascular disease. **Table V in the Supplement** provides full names of the contributing trials.

**Supplemental Table IV. Intervention effects on progression of individual outcomes and different cIMT types**

| Trial           | Trial arm                                                                                                                      | RR (95% CI)        |                     |                     |                    |                     | Mean difference in progression (95% CI) |                 |                 |                |
|-----------------|--------------------------------------------------------------------------------------------------------------------------------|--------------------|---------------------|---------------------|--------------------|---------------------|-----------------------------------------|-----------------|-----------------|----------------|
|                 |                                                                                                                                | CVD                | MI                  | Stroke              | Revascularisation  | Fatal CVD           | All-cause mortality                     | Mean CCA-IMT    | Max CCA-IMT     | Other cIMT     |
| ACAPS           | Placebo                                                                                                                        | [Reference]        | [Reference]         | [Reference]         | NR                 | [Reference]         | [Reference]                             | NR              | [Reference]     | NR             |
|                 | Lovastatin (10-40mg)                                                                                                           | 0.38 (0.14, 1.07)  | 0.83 (0.25, 2.72)   | <0.01 (<0.01, >100) | NR                 | <0.01 (<0.01, >100) | 0.28 (0.06, 1.36)                       | NR              | -3 (-8, 2)      | NR             |
|                 | Warfarin (1mg)                                                                                                                 | 0.64 (0.25, 1.65)  | 0.38 (0.10, 1.42)   | 4.02 (0.45, 35.98)  | NR                 | 0.20 (0.02, 1.72)   | 0.29 (0.06, 1.38)                       | NR              | 1 (-3, 6)       | NR             |
| ACT NOW         | Placebo                                                                                                                        | [Reference]        | [Reference]         | [Reference]         | [Reference]        | [Reference]         | [Reference]                             | [Reference]     | NR              | NR             |
|                 | Pioglitazone (30-45mg)                                                                                                         | 0.44 (0.14, 1.41)  | 1.97 (0.18, 21.65)  | 0.99 (0.02, 49.57)  | 0.25 (0.05, 1.15)  | 0.99 (0.02, 49.57)  | 2.96 (0.31, 28.30)                      | -5 (-9, -1)     | NR              | NR             |
| ALLO-IMT        | Placebo                                                                                                                        | [Reference]        | [Reference]         | [Reference]         | NR                 | [Reference]         | [Reference]                             | [Reference]     | [Reference]     | NR             |
|                 | Allopurinol (300mg)                                                                                                            | 0.36 (0.09, 1.34)  | 1.03 (0.06, 16.46)  | 0.66 (0.11, 3.94)   | NR                 | 1.00 (<0.01, >100)  | <0.01 (<0.01, >100)                     | -68 (-142, 6)   | -61 (-148, 27)  | NR             |
| AMAR            | Placebo                                                                                                                        | [Reference]        | [Reference]         | [Reference]         | NR                 | [Reference]         | [Reference]                             | [Reference]     | NR              | NR             |
|                 | Allicor (300mg)                                                                                                                | 0.58 (0.24, 1.39)  | 0.52 (0.16, 1.63)   | 0.58 (0.11, 3.11)   | NR                 | 0.77 (0.22, 2.67)   | 0.66 (0.20, 2.21)                       | -37 (-60, -14)  | NR              | NR             |
| ARBITER         | Pravastatin (40mg)                                                                                                             | [Reference]        | [Reference]         | [Reference]         | [Reference]        | [Reference]         | [Reference]                             | [Reference]     | [Reference]     | NR             |
|                 | Atorvastatin (80mg)                                                                                                            | 1.04 (0.22, 4.99)  | 1.56 (0.27, 9.07)   | 0.35 (0.01, 8.37)   | 3.11 (0.33, 29.31) | 1.04 (0.02, 51.68)  | 1.04 (0.02, 51.68)                      | -59 (-112, -6)  | -153 (-323, 17) | NR             |
| ARBITER 2       | Placebo                                                                                                                        | [Reference]        | [Reference]         | [Reference]         | [Reference]        | NR                  | [Reference]                             | [Reference]     | NR              | NR             |
|                 | Niacin (1g)                                                                                                                    | 0.39 (0.11, 1.47)  | 0.92 (0.13, 6.38)   | 0.31 (0.01, 7.42)   | 0.23 (0.03, 2.01)  | NR                  | 0.46 (0.04, 4.97)                       | -30 (-63, 3)    | NR              | NR             |
| ARBITER 6-HALTS | Ezetimibe (10mg)                                                                                                               | [Reference]        | [Reference]         | NR                  | [Reference]        | [Reference]         | NR                                      | [Reference]     | [Reference]     | NR             |
|                 | Niacin (2g)                                                                                                                    | 0.21 (0.05, 0.95)  | 0.31 (0.03, 2.99)   | NR                  | 0.13 (<0.01, 2.58) | 0.19 (0.02, 1.60)   | NR                                      | -12 (-20, -3)   | -15 (-25, -4)   | NR             |
| ARTSTIFF        | Olmesartan (20mg)                                                                                                              | [Reference]        | [Reference]         | [Reference]         | NR                 | [Reference]         | [Reference]                             | [Reference]     | NR              | NR             |
|                 | Olmesartan (40mg)                                                                                                              | 1.05 (0.02, 51.61) | 1.05 (0.02, 51.61)  | 1.05 (0.02, 51.61)  | NR                 | 1.05 (0.02, 51.61)  | 3.14 (0.13, 75.02)                      | 28 (-28, 84)    | NR              | NR             |
|                 | Olmesartan (80mg)                                                                                                              | 0.94 (0.02, 46.17) | 0.94 (0.02, 46.17)  | 0.94 (0.02, 46.17)  | NR                 | 0.94 (0.02, 46.17)  | 0.94 (0.02, 46.17)                      | -1 (-47, 45)    | NR              | NR             |
| ASAP-FINLAND    | Placebo                                                                                                                        | [Reference]        | NR                  | NR                  | NR                 | NR                  | [Reference]                             | [Reference]     | NR              | NR             |
|                 | Vitamin C (250mg) or Vitamin E (136IU) or both                                                                                 | 2.11 (0.63, 7.02)  | NR                  | NR                  | NR                 | NR                  | 2.11 (0.63, 7.02)                       | -4 (-7, -0)     | NR              | NR             |
| ASAP-NL         | Simvastatin (40mg)                                                                                                             | [Reference]        | [Reference]         | [Reference]         | NR                 | [Reference]         | [Reference]                             | [Reference]     | NR              | NR             |
|                 | Atorvastatin (80mg)                                                                                                            | 0.69 (0.12, 4.08)  | 0.69 (0.12, 4.08)   | 1.04 (0.02, 51.96)  | NR                 | 1.04 (0.07, 16.44)  | 0.52 (0.05, 5.66)                       | -12 (-24, 1)    | NR              | NR             |
| ASFAST          | Placebo                                                                                                                        | [Reference]        | [Reference]         | [Reference]         | [Reference]        | [Reference]         | [Reference]                             | NR              | [Reference]     | NR             |
|                 | Folic acid (15mg)                                                                                                              | 0.84 (0.56, 1.26)  | 1.23 (0.70, 2.17)   | 0.45 (0.20, 1.01)   | 2.24 (0.80, 6.30)  | 0.89 (0.52, 1.53)   | 1.00 (0.71, 1.41)                       | NR              | -10 (-35, 15)   | NR             |
| ATIC            | Placebo                                                                                                                        | [Reference]        | [Reference]         | [Reference]         | NR                 | [Reference]         | [Reference]                             | [Reference]     | NR              | NR             |
|                 | Pravastatin (40mg) + $\alpha$ -tocopherol (300mg) + Folic acid (5mg) + Pyridoxine hydrochloride (100mg) + Cyanocobalamin (1mg) | 0.98 (0.14, 6.66)  | 1.96 (0.18, 20.85)  | 0.98 (0.02, 48.30)  | NR                 | 0.33 (0.01, 7.80)   | 0.33 (0.01, 7.80)                       | -87 (-107, -67) | NR              | NR             |
| Ahn et al.      | Atorvastatin (10mg) + Aspirin (100mg) + Clopidogrel (75mg)                                                                     | [Reference]        | [Reference]         | [Reference]         | [Reference]        | NR                  | [Reference]                             | NR              | NR              | [Reference]    |
|                 | Atorvastatin (10mg) + Aspirin (100mg) + Clopidogrel (75mg) + Cilostazol (200mg)                                                | 0.83 (0.35, 1.96)  | 0.52 (0.05, 5.55)   | 1.03 (0.07, 16.14)  | 1.03 (0.31, 3.39)  | NR                  | 0.52 (0.05, 5.55)                       | NR              | NR              | -80 (-154, -6) |
| Andrews et al.  | Placebo                                                                                                                        | [Reference]        | [Reference]         | [Reference]         | NR                 | [Reference]         | [Reference]                             | [Reference]     | NR              | NR             |
|                 | Allopurinol (300mg)                                                                                                            | 3.15 (0.13, 75.12) | 1.05 (0.02, 51.70)  | 1.05 (0.02, 51.70)  | NR                 | 3.15 (0.13, 75.12)  | 3.15 (0.13, 75.12)                      | -87 (-261, 87)  | NR              | NR             |
| BCAPS           | Placebo                                                                                                                        | NR                 | NR                  | NR                  | NR                 | NR                  | NR                                      | [Reference]     | NR              | NR             |
|                 | Fluvastatin (40mg)                                                                                                             | 0.64 (0.25, 1.64)  | NR                  | NR                  | NR                 | NR                  | NR                                      | -8 (-15, -2)    | NR              | NR             |
|                 | Metoprolol (25mg)                                                                                                              | 0.39 (0.14, 1.07)  | NR                  | NR                  | NR                 | NR                  | NR                                      | -1 (-7, 6)      | NR              | NR             |
| BKREGISTRY-II   | Usual therapy                                                                                                                  | [Reference]        | [Reference]         | [Reference]         | NR                 | [Reference]         | [Reference]                             | [Reference]     | NR              | NR             |
|                 | Usual therapy + Atorvastatin (10mg)                                                                                            | 0.44 (0.04, 4.84)  | <0.01 (<0.01, >100) | 0.88 (0.05, 14.03)  | NR                 | 1.00 (<0.01, >100)  | 1.00 (<0.01, >100)                      | 48 (-47, 142)   | NR              | NR             |
| BVAIT           | Placebo                                                                                                                        | [Reference]        | NR                  | NR                  | NR                 | NR                  | [Reference]                             | [Reference]     | NR              | NR             |
|                 | Folic acid (5mg) + Vitamin B6 (50mg) + Vitamin B12 (0.4mg)                                                                     | 0.81 (0.34, 1.93)  | NR                  | NR                  | NR                 | NR                  | 0.20 (<0.01, 4.11)                      | -1 (-2, 1)      | NR              | NR             |
| CAIUS           | Placebo                                                                                                                        | [Reference]        | [Reference]         | [Reference]         | [Reference]        | [Reference]         | [Reference]                             | NR              | [Reference]     | NR             |

|                  |                                                              |                    |                     |                     |                    |                     |                    |                |                 |                |
|------------------|--------------------------------------------------------------|--------------------|---------------------|---------------------|--------------------|---------------------|--------------------|----------------|-----------------|----------------|
|                  | Pravastatin (40mg)                                           | 1.53 (0.26, 9.03)  | 1.02 (0.15, 7.15)   | 1.02 (0.02, 51.07)  | 3.06 (0.13, 74.52) | 3.06 (0.13, 74.52)  | 3.06 (0.13, 74.52) | NR             | -11 (-18, -3)   | NR             |
| CAMERA           | Placebo                                                      | [Reference]        | [Reference]         | [Reference]         | [Reference]        | [Reference]         | NR                 | [Reference]    | NR              | NR             |
|                  | Metformin (1.7g)                                             | 0.56 (0.17, 1.86)  | 0.18 (0.02, 1.51)   | >100 (<0.01, >100)  | 0.46 (0.09, 2.38)  | >100 (<0.01, >100)  | NR                 | 7 (-5, 19)     | NR              | NR             |
| CAPPA            | Aspirin (100mg)                                              | [Reference]        | [Reference]         | [Reference]         | NR                 | [Reference]         | [Reference]        | [Reference]    | [Reference]     | NR             |
|                  | Cilostazol (200mg)                                           | 1.02 (0.21, 5.02)  | 0.68 (0.12, 4.04)   | 3.07 (0.13, 75.01)  | NR                 | 1.02 (0.02, 51.39)  | 1.02 (0.06, 16.27) | -21 (-33, -9)  | -25 (-45, -6)   | NR             |
| CAPTIVATE        | Placebo                                                      | [Reference]        | [Reference]         | [Reference]         | [Reference]        | [Reference]         | NR                 | NR             | NR              | [Reference]    |
|                  | Pactimibe (100mg)                                            | 1.65 (0.82, 3.34)  | 3.30 (0.92, 11.92)  | 2.97 (0.12, 72.79)  | 1.26 (0.58, 2.75)  | 2.97 (0.31, 28.48)  | NR                 | NR             | NR              | 14 (0, 28)     |
| CERDIA           | Placebo                                                      | [Reference]        | [Reference]         | [Reference]         | NR                 | [Reference]         | [Reference]        | [Reference]    | [Reference]     | NR             |
|                  | Cerivastatin (0.4mg) / Simvastatin (20mg)                    | 0.34 (0.11, 1.08)  | <0.01 (<0.01, >100) | 0.35 (0.07, 1.80)   | NR                 | <0.01 (<0.01, >100) | 0.72 (0.16, 3.22)  | 2 (-7, 12)     | 8 (-3, 19)      | NR             |
| CHICAGO          | Glimepiride (1-4mg)                                          | [Reference]        | [Reference]         | [Reference]         | [Reference]        | [Reference]         | [Reference]        | [Reference]    | [Reference]     | NR             |
|                  | Pioglitazone (15-45mg)                                       | 0.30 (0.08, 1.07)  | 0.33 (0.01, 8.07)   | 0.33 (0.01, 8.07)   | 0.37 (0.10, 1.38)  | 0.99 (0.02, 49.75)  | 2.97 (0.12, 72.63) | -9 (-17, -1)   | -17 (-30, -4)   | NR             |
| CIMT phase 1     | Placebo                                                      | [Reference]        | NR                  | NR                  | NR                 | NR                  | [Reference]        | [Reference]    | [Reference]     | NR             |
|                  | Metformin (2g)                                               | 0.82 (0.35, 1.93)  | NR                  | NR                  | NR                 | NR                  | 5.00 (0.24, >100)  | 8 (-2, 18)     | 7 (-4, 19)      | NR             |
| CLAS             | Placebo                                                      | [Reference]        | [Reference]         | NR                  | [Reference]        | [Reference]         | NR                 | [Reference]    | NR              | NR             |
|                  | Colestipol (30g) + Niacin (4.2g)                             | 0.66 (0.48, 0.90)  | 0.37 (0.18, 0.74)   | NR                  | 0.94 (0.59, 1.52)  | 0.34 (0.07, 1.64)   | NR                 | -25 (-37, -13) | NR              | NR             |
| CONTRAST         | Low-flux haemodialysis                                       | [Reference]        | [Reference]         | [Reference]         | [Reference]        | [Reference]         | [Reference]        | [Reference]    | [Reference]     | NR             |
|                  | On-line haemodiafiltration                                   | 1.12 (0.83, 1.52)  | 0.81 (0.53, 1.24)   | 1.17 (0.60, 2.27)   | 1.23 (0.84, 1.79)  | 0.47 (0.16, 1.35)   | 0.95 (0.75, 1.20)  | 3 (-38, 44)    | 4 (-47, 55)     | NR             |
| Cao et al.       | Lifestyle intervention                                       | [Reference]        | [Reference]         | [Reference]         | [Reference]        | [Reference]         | [Reference]        | NR             | NR              | [Reference]    |
|                  | Lifestyle intervention + Oligomeric proanthocyanidin (200mg) | 0.28 (0.13, 0.58)  | 0.25 (0.10, 0.66)   | 0.48 (0.04, 5.27)   | 0.28 (0.06, 1.31)  | 0.97 (0.02, 48.34)  | 0.97 (0.02, 48.34) | NR             | NR              | -56 (-90, -21) |
| DAPC             | Aspirin (100mg)                                              | [Reference]        | [Reference]         | [Reference]         | NR                 | [Reference]         | [Reference]        | [Reference]    | [Reference]     | NR             |
|                  | Cilostazol (200mg)                                           | 0.52 (0.05, 5.72)  | 1.05 (0.02, 52.49)  | 0.52 (0.05, 5.72)   | NR                 | 3.14 (0.13, 76.58)  | 5.24 (0.25, >100)  | -36 (-57, -14) | -74 (-104, -43) | NR             |
| DAPHNE           | HCTZ (1-16mg)                                                | [Reference]        | [Reference]         | [Reference]         | [Reference]        | [Reference]         | NR                 | NR             | NR              | [Reference]    |
|                  | Doxazosin (12.5-100mg)                                       | 1.22 (0.50, 2.96)  | 8.56 (0.48, >100)   | 0.19 (<0.01, 3.84)  | 0.95 (0.30, 3.03)  | 0.95 (0.02, 46.78)  | NR                 | NR             | NR              | 2 (-10, 15)    |
| DOIT             | No dietary advice                                            | [Reference]        | NR                  | NR                  | NR                 | NR                  | [Reference]        | [Reference]    | NR              | NR             |
|                  | Dietary advice                                               | 0.75 (0.47, 1.20)  | NR                  | NR                  | NR                 | NR                  | 0.81 (0.43, 1.50)  | -6 (-12, -0)   | NR              | NR             |
| EGE STUDY        | Low-flux membrane                                            | [Reference]        | NR                  | NR                  | NR                 | [Reference]         | [Reference]        | [Reference]    | NR              | NR             |
|                  | High-flux membrane                                           | 0.91 (0.55, 1.50)  | NR                  | NR                  | NR                 | 0.91 (0.55, 1.50)   | 0.87 (0.60, 1.25)  | -3 (-14, 8)    | NR              | NR             |
|                  | Ultrapore dialysate                                          | 1.05 (0.63, 1.75)  | NR                  | NR                  | NR                 | 1.05 (0.63, 1.75)   | 1.14 (0.80, 1.65)  | 3 (-7, 14)     | NR              | NR             |
| ELITE (early MP) | Placebo                                                      | [Reference]        | [Reference]         | [Reference]         | NR                 | [Reference]         | [Reference]        | [Reference]    | NR              | NR             |
|                  | 17 $\beta$ -estradiol (1mg)                                  | 0.33 (0.01, 7.93)  | 0.33 (0.01, 7.93)   | 0.98 (0.02, 48.94)  | NR                 | 0.98 (0.02, 48.94)  | 0.33 (0.01, 7.93)  | -3 (-6, -1)    | NR              | NR             |
| ELITE (late MP)  | Placebo                                                      | [Reference]        | [Reference]         | [Reference]         | NR                 | [Reference]         | [Reference]        | [Reference]    | NR              | NR             |
|                  | 17 $\beta$ -estradiol (1mg)                                  | 1.50 (0.25, 8.87)  | 1.50 (0.25, 8.87)   | 1.00 (0.02, 50.14)  | NR                 | 1.00 (0.02, 50.14)  | 3.00 (0.12, 73.17) | 1 (-1, 3)      | NR              | NR             |
| ELSA             | Atenolol (50-100mg)                                          | [Reference]        | [Reference]         | [Reference]         | NR                 | [Reference]         | [Reference]        | NR             | NR              | [Reference]    |
|                  | Lacidipine (4-6mg)                                           | 0.80 (0.49, 1.33)  | 1.04 (0.54, 2.01)   | 0.63 (0.27, 1.45)   | NR                 | 0.49 (0.15, 1.63)   | 0.75 (0.37, 1.54)  | NR             | NR              | -2 (-11, 7)    |
| ELVA             | Placebo                                                      | [Reference]        | [Reference]         | [Reference]         | NR                 | [Reference]         | [Reference]        | [Reference]    | NR              | NR             |
|                  | Metoprolol CR/XL (100mg)                                     | 3.24 (0.35, 30.35) | 3.24 (0.35, 30.35)  | 1.08 (0.02, 53.64)  | NR                 | 1.08 (0.02, 53.64)  | 1.08 (0.02, 53.64) | -24 (-45, -2)  | NR              | NR             |
| ENCORE           | Usual care                                                   | [Reference]        | NR                  | [Reference]         | NR                 | NR                  | NR                 | [Reference]    | NR              | NR             |
|                  | DASH diet                                                    | 0.36 (<0.01, >100) | NR                  | 0.36 (<0.01, >100)  | NR                 | NR                  | NR                 | 29 (-39, 98)   | NR              | NR             |
|                  | DASH diet + Weight management                                | 0.35 (<0.01, >100) | NR                  | 0.35 (<0.01, >100)  | NR                 | NR                  | NR                 | -12 (-79, 55)  | NR              | NR             |
| ENHANCE          | Simvastatin (80mg) + Placebo                                 | [Reference]        | [Reference]         | [Reference]         | [Reference]        | [Reference]         | [Reference]        | [Reference]    | [Reference]     | NR             |
|                  | Simvastatin (80mg) + Ezetimibe (10mg)                        | 1.09 (0.63, 1.87)  | 1.18 (0.68, 2.07)   | <0.01 (<0.01, >100) | 1.47 (0.41, 5.21)  | 2.02 (0.18, 22.27)  | 2.03 (0.18, 22.44) | 2 (-4, 8)      | 2 (-5, 10)      | NR             |
| EPAT             | Placebo                                                      | [Reference]        | [Reference]         | [Reference]         | [Reference]        | [Reference]         | NR                 | [Reference]    | NR              | NR             |
|                  | 17 $\beta$ -estradiol (1mg)                                  | 0.40 (0.08, 2.02)  | 0.50 (0.05, 5.44)   | 3.00 (0.12, 72.85)  | 0.50 (0.05, 5.44)  | 0.33 (0.01, 8.09)   | NR                 | -5 (-11, -0)   | NR              | NR             |
| FIELD            | Placebo                                                      | [Reference]        | [Reference]         | [Reference]         | [Reference]        | [Reference]         | [Reference]        | NR             | [Reference]     | NR             |
|                  | Fenofibrate (200mg)                                          | 0.90 (0.81, 0.99)  | 0.89 (0.76, 1.05)   | 0.90 (0.73, 1.12)   | 0.81 (0.71, 0.92)  | 1.10 (0.87, 1.40)   | 1.10 (0.95, 1.28)  | NR             | -2 (-23, 19)    | NR             |
| FIRST            | Atorvastatin + Placebo                                       | [Reference]        | NR                  | NR                  | NR                 | NR                  | [Reference]        | NR             | [Reference]     | NR             |
|                  | Atorvastatin + Fenofibrate (135mg)                           | 0.88 (0.44, 1.77)  | NR                  | NR                  | NR                 | NR                  | 0.25 (0.03, 2.24)  | NR             | -2 (-15, 11)    | NR             |

|                   |                                                                            |                    |                    |                    |                     |                    |                    |                |                  |                |
|-------------------|----------------------------------------------------------------------------|--------------------|--------------------|--------------------|---------------------|--------------------|--------------------|----------------|------------------|----------------|
| FRANCIS           | Usual care                                                                 | [Reference]        | [Reference]        | [Reference]        | [Reference]         | [Reference]        | [Reference]        | [Reference]    | NR               | NR             |
|                   | Treat-to-target                                                            | 0.27 (0.06, 1.29)  | 0.14 (<0.01, 2.62) | 0.32 (0.01, 7.75)  | 0.96 (0.14, 6.69)   | 0.14 (<0.01, 2.62) | 0.68 (0.22, 2.10)  | -4 (-8, -0)    | NR               | NR             |
| GRACE             | Placebo                                                                    | [Reference]        | [Reference]        | [Reference]        | [Reference]         | [Reference]        | [Reference]        | [Reference]    | [Reference]      | NR             |
|                   | Insulin glargine (target fasting glucose≤5.3mg/dL)                         | 0.99 (0.81, 1.22)  | 1.02 (0.76, 1.35)  | 1.36 (0.83, 2.23)  | 0.83 (0.61, 1.13)   | 0.95 (0.61, 1.48)  | 0.95 (0.72, 1.25)  | -2 (-5, 1)     | -3 (-6, -0)      | NR             |
|                   | ω3 fatty acids (1g)                                                        | 1.09 (0.89, 1.33)  | 1.27 (0.95, 1.70)  | 0.81 (0.49, 1.32)  | 0.92 (0.68, 1.25)   | 1.22 (0.78, 1.90)  | 0.89 (0.68, 1.18)  | -0 (-4, 3)     | -0 (-3, 3)       | NR             |
| Gresle et al.     | Placebo                                                                    | [Reference]        | [Reference]        | [Reference]        | NR                  | [Reference]        | [Reference]        | [Reference]    | [Reference]      | NR             |
|                   | NCX 4016 (1.6g)                                                            | 0.67 (0.16, 2.82)  | 0.45 (0.09, 2.34)  | >100 (<0.01, >100) | NR                  | 1.00 (<0.01, >100) | 1.00 (<0.01, >100) | -29 (-100, 43) | -58 (-141, 25)   | NR             |
| HART              | Placebo                                                                    | [Reference]        | [Reference]        | [Reference]        | NR                  | [Reference]        | [Reference]        | [Reference]    | [Reference]      | NR             |
|                   | Folic acid (2.5mg) + Vitamin B6 (50mg) + Vitamin B12 (1mg)                 | 0.88 (0.64, 1.21)  | 0.86 (0.57, 1.29)  | 1.28 (0.60, 2.73)  | NR                  | 0.63 (0.32, 1.22)  | 0.69 (0.48, 0.99)  | 5 (2, 8)       | 7 (3, 10)        | NR             |
| HERS              | Placebo                                                                    | [Reference]        | [Reference]        | [Reference]        | NR                  | [Reference]        | [Reference]        | NR             | [Reference]      | NR             |
|                   | Conjugated equine estrogen (0.625mg) + Medroxyprogesterone acetate (2.5mg) | 1.03 (0.89, 1.20)  | 0.93 (0.75, 1.17)  | 1.13 (0.87, 1.47)  | NR                  | 1.23 (0.87, 1.72)  | 1.07 (0.84, 1.35)  | NR             | 4 (-4, 12)       | NR             |
| HYRIM             | Placebo                                                                    | [Reference]        | [Reference]        | [Reference]        | NR                  | [Reference]        | [Reference]        | NR             | [Reference]      | NR             |
|                   | Fluvastatin (40mg)                                                         | 0.80 (0.45, 1.42)  | 0.74 (0.40, 1.36)  | 0.74 (0.17, 3.32)  | NR                  | 0.50 (0.04, 5.46)  | 0.80 (0.21, 2.97)  | NR             | -1 (-6, 3)       | NR             |
|                   | Lifestyle intervention                                                     | 0.69 (0.38, 1.23)  | 0.69 (0.37, 1.27)  | 1.37 (0.31, 6.14)  | NR                  | 0.51 (0.05, 5.60)  | 1.28 (0.34, 4.75)  | NR             | -1 (-6, 4)       | NR             |
| INSIGHT           | Nifedipine (30mg)                                                          | [Reference]        | [Reference]        | [Reference]        | NR                  | [Reference]        | [Reference]        | [Reference]    | NR               | NR             |
|                   | HCTZ (25mg) + Amloride (2.5mg)                                             | 0.97 (0.79, 1.19)  | 0.89 (0.67, 1.19)  | 1.10 (0.79, 1.53)  | NR                  | 0.86 (0.60, 1.25)  | 0.99 (0.80, 1.23)  | 6 (-1, 12)     | NR               | NR             |
| J-STARS           | Placebo                                                                    | [Reference]        | [Reference]        | [Reference]        | NR                  | NR                 | [Reference]        | [Reference]    | [Reference]      | NR             |
|                   | Pravastatin (10mg)                                                         | 1.00 (0.82, 1.24)  | 0.57 (0.17, 1.92)  | 0.96 (0.74, 1.24)  | NR                  | NR                 | 1.22 (0.79, 1.88)  | -20 (-34, -5)  | NR               | NR             |
| JART              | Pravastatin (10-20mg)                                                      | [Reference]        | [Reference]        | [Reference]        | [Reference]         | NR                 | [Reference]        | [Reference]    | [Reference]      | NR             |
|                   | Rosuvastatin (5-10mg)                                                      | 0.29 (0.06, 1.37)  | 0.51 (0.05, 5.53)  | 1.01 (0.06, 16.04) | 0.14 (<0.01, 2.78)  | NR                 | 0.34 (0.01, 8.22)  | -24 (-44, -4)  | -70 (-132, -8)   | NR             |
| KAPS              | Placebo                                                                    | [Reference]        | [Reference]        | [Reference]        | [Reference]         | [Reference]        | [Reference]        | NR             | [Reference]      | NR             |
|                   | Pravastatin (40mg)                                                         | 0.64 (0.31, 1.34)  | 0.37 (0.10, 1.39)  | 0.50 (0.09, 2.69)  | 0.80 (0.22, 2.93)   | 0.66 (0.11, 3.93)  | 0.75 (0.17, 3.30)  | NR             | -19 (-31, -7)    | NR             |
| KEEPS             | Placebo                                                                    | [Reference]        | [Reference]        | [Reference]        | NR                  | [Reference]        | [Reference]        | [Reference]    | [Reference]      | NR             |
|                   | Estrogen (0.45mg)                                                          | 1.20 (0.02, 60.03) | 1.20 (0.02, 60.03) | 1.20 (0.02, 60.03) | NR                  | 1.20 (0.02, 60.03) | 3.59 (0.15, 87.63) | 1 (-1, 3)      | NR               | NR             |
|                   | t-17β-estradiol (1μg)                                                      | 3.72 (0.15, 90.78) | 3.72 (0.15, 90.78) | 1.24 (0.02, 62.18) | NR                  | 1.24 (0.02, 62.18) | 1.24 (0.02, 62.18) | 1 (-2, 3)      | NR               | NR             |
| KIMVASC           | Placebo                                                                    | [Reference]        | [Reference]        | [Reference]        | NR                  | [Reference]        | [Reference]        | [Reference]    | [Reference]      | NR             |
|                   | Vitamin K2 (0.1mg)                                                         | >100 (<0.01, >100) | >100 (<0.01, >100) | 1.00 (<0.01, >100) | NR                  | >100 (<0.01, >100) | >100 (<0.01, >100) | 68 (-52, 188)  | NR               | NR             |
| Katakami et al.   | Glibenclamide (1.25-7.5mg)                                                 | [Reference]        | [Reference]        | [Reference]        | NR                  | [Reference]        | [Reference]        | NR             | NR               | [Reference]    |
|                   | Glicazide (20-120mg)                                                       | 2.19 (0.04, >100)  | 2.19 (0.04, >100)  | 2.19 (0.04, >100)  | NR                  | 2.19 (0.04, >100)  | 2.19 (0.04, >100)  | NR             | NR               | -32 (-54, -10) |
|                   | Glibenclamide (1.25-5mg) + Metformin (500-750mg)                           | 1.98 (0.04, 97.79) | 1.98 (0.04, 97.79) | 1.98 (0.04, 97.79) | NR                  | 1.98 (0.04, 97.79) | 1.98 (0.04, 97.79) | NR             | NR               | -61 (-90, -32) |
| Koyasu et al.     | Placebo                                                                    | [Reference]        | [Reference]        | [Reference]        | NR                  | [Reference]        | [Reference]        | NR             | [Reference]      | NR             |
|                   | Acarbose (150mg)                                                           | 1.00 (0.02, 49.31) | 1.00 (0.02, 49.31) | 1.00 (0.02, 49.31) | NR                  | 1.00 (0.02, 49.31) | 1.00 (0.02, 49.31) | NR             | -150 (-261, -39) | NR             |
| LAARS             | Atenolol (50mg)                                                            | [Reference]        | [Reference]        | [Reference]        | NR                  | [Reference]        | NR                 | [Reference]    | NR               | NR             |
|                   | Losartan (50mg)                                                            | 0.97 (0.02, 48.64) | 0.97 (0.02, 48.64) | 0.97 (0.02, 48.64) | NR                  | 0.97 (0.02, 48.64) | NR                 | 4 (-7, 15)     | NR               | NR             |
| LIFE-ICARUS       | Atenolol (50-100mg)                                                        | [Reference]        | [Reference]        | [Reference]        | [Reference]         | [Reference]        | [Reference]        | [Reference]    | [Reference]      | NR             |
|                   | Losartan (50-100mg)                                                        | 1.17 (0.29, 4.70)  | >100 (<0.01, >100) | 0.58 (0.05, 6.38)  | <0.01 (<0.01, >100) | 1.20 (0.07, 19.14) | 0.76 (0.13, 4.57)  | -8 (-22, 6)    | NR               | NR             |
| LIPID             | Placebo                                                                    | [Reference]        | [Reference]        | [Reference]        | [Reference]         | [Reference]        | [Reference]        | [Reference]    | [Reference]      | NR             |
|                   | Pravastatin (40mg)                                                         | 0.78 (0.74, 0.83)  | 0.72 (0.63, 0.83)  | 0.83 (0.68, 1.01)  | 0.82 (0.74, 0.91)   | 0.76 (0.67, 0.87)  | 0.78 (0.70, 0.88)  | -16 (-23, -8)  | NR               | NR             |
| Luijendijk et al. | No treatment                                                               | [Reference]        | [Reference]        | [Reference]        | NR                  | [Reference]        | [Reference]        | [Reference]    | [Reference]      | NR             |
|                   | Atorvastatin (80mg)                                                        | 0.94 (0.02, 46.66) | 0.94 (0.02, 46.66) | 0.94 (0.02, 46.66) | NR                  | 0.94 (0.02, 46.66) | 0.94 (0.02, 46.66) | -5 (-14, 5)    | NR               | NR             |
| MARS              | Placebo                                                                    | [Reference]        | NR                 | [Reference]        | NR                  | NR                 | [Reference]        | [Reference]    | NR               | NR             |
|                   | Lovastatin (80mg)                                                          | 0.70 (0.43, 1.14)  | NR                 | 0.34 (0.01, 8.23)  | NR                  | NR                 | 2.03 (0.19, 22.12) | -43 (-68, -18) | NR               | NR             |
| MAVET             | Placebo                                                                    | [Reference]        | NR                 | NR                 | NR                  | [Reference]        | [Reference]        | NR             | [Reference]      | NR             |
|                   | Vitamin E (500IU)                                                          | 0.50 (0.09, 2.69)  | NR                 | NR                 | NR                  | 0.50 (0.09, 2.69)  | 0.53 (0.24, 1.15)  | NR             | 4 (-2, 10)       | NR             |
| MECANO            | Cyclosporine A                                                             | [Reference]        | [Reference]        | [Reference]        | [Reference]         | [Reference]        | [Reference]        | [Reference]    | NR               | NR             |

|                    |                                                                                 |                    |                    |                     |                    |                     |                    |                |                |               |
|--------------------|---------------------------------------------------------------------------------|--------------------|--------------------|---------------------|--------------------|---------------------|--------------------|----------------|----------------|---------------|
|                    | Everolimus                                                                      | 1.85 (0.35, 9.88)  | 0.93 (0.06, 14.60) | 2.78 (0.11, 67.39)  | 0.31 (0.01, 7.49)  | 2.78 (0.29, 26.25)  | 3.71 (0.42, 32.55) | -5 (-7, -2)    | NR             | NR            |
| MEDICLAS           | Lopinavir (800mg) + Ritonavir (200mg) + Zidovudine (600mg) + Lamivudine (266mg) | [Reference]        | [Reference]        | [Reference]         | NR                 | [Reference]         | [Reference]        | [Reference]    | NR             | NR            |
|                    | Lopinavir (1066mg) + Ritonavir (266mg) + Nevirapine (400mg)                     | >100 (<0.01, >100) | >100 (<0.01, >100) | 1.00 (<0.01, >100)  | NR                 | >100 (<0.01, >100)  | >100 (<0.01, >100) | -6 (-22, 10)   | NR             | NR            |
| METEOR             | Placebo                                                                         | [Reference]        | [Reference]        | [Reference]         | NR                 | [Reference]         | [Reference]        | [Reference]    | [Reference]    | NR            |
|                    | Rosuvastatin (40mg)                                                             | 2.81 (0.15, 54.27) | 2.81 (0.15, 54.27) | 0.40 (<0.01, 20.20) | NR                 | 0.40 (<0.01, 20.20) | 1.21 (0.05, 29.50) | -8 (-11, -6)   | -12 (-17, -7)  | NR            |
| MG600              | Placebo                                                                         | [Reference]        | [Reference]        | [Reference]         | NR                 | [Reference]         | NR                 | [Reference]    | [Reference]    | NR            |
|                    | Magnesium chelate (600mg)                                                       | 1.00 (<0.01, >100) | 1.00 (<0.01, >100) | 1.00 (<0.01, >100)  | NR                 | 1.00 (<0.01, >100)  | NR                 | 100 (-73, 272) | 46 (-267, 360) | NR            |
| MIDAS              | HCTZ (25-50mg)                                                                  | [Reference]        | [Reference]        | [Reference]         | [Reference]        | [Reference]         | [Reference]        | NR             | [Reference]    | NR            |
|                    | Isradipine (5-10mg)                                                             | 1.24 (0.71, 2.16)  | 1.14 (0.42, 3.12)  | 2.00 (0.50, 7.93)   | 1.10 (0.47, 2.56)  | 1.00 (0.20, 4.92)   | 0.89 (0.35, 2.28)  | NR             | 1 (-5, 7)      | NR            |
| MITEC              | Amlodipine besylate (5mg)                                                       | [Reference]        | NR                 | NR                  | NR                 | [Reference]         | [Reference]        | [Reference]    | NR             | NR            |
|                    | Candesartan cilexetil (8mg)                                                     | 1.09 (0.02, 54.42) | NR                 | NR                  | NR                 | 1.09 (0.02, 54.42)  | 1.09 (0.02, 54.42) | 8 (-17, 33)    | NR             | NR            |
| Makimura et al.    | Placebo                                                                         | [Reference]        | [Reference]        | [Reference]         | NR                 | [Reference]         | [Reference]        | [Reference]    | NR             | NR            |
|                    | Tesamorelin (2mg)                                                               | 0.94 (0.02, 45.63) | 0.94 (0.02, 45.63) | 0.94 (0.02, 45.63)  | NR                 | 0.94 (0.02, 45.63)  | 0.94 (0.02, 45.63) | -40 (-70, -10) | NR             | NR            |
| Masia et al.       | Standard care                                                                   | [Reference]        | [Reference]        | [Reference]         | [Reference]        | [Reference]         | [Reference]        | [Reference]    | [Reference]    | NR            |
|                    | Intensified care                                                                | 1.33 (0.19, 9.46)  | 0.68 (0.06, 7.51)  | 1.00 (<0.01, >100)  | >100 (<0.01, >100) | 1.00 (<0.01, >100)  | 3.98 (1.07, 14.72) | -5 (-15, 5)    | -2 (-27, 23)   | NR            |
| Mitsuhashi et al.  | Control                                                                         | [Reference]        | [Reference]        | [Reference]         | NR                 | [Reference]         | NR                 | NR             | NR             | [Reference]   |
|                    | Cilostazol (100-150 mg)                                                         | 0.33 (0.01, 7.87)  | 1.00 (0.02, 48.83) | 0.33 (0.01, 7.87)   | NR                 | 1.00 (0.02, 48.83)  | NR                 | NR             | NR             | -35 (-63, -7) |
| Mortazavi et al.   | Placebo                                                                         | [Reference]        | NR                 | [Reference]         | NR                 | NR                  | [Reference]        | [Reference]    | NR             | NR            |
|                    | Magnesium (107mg)                                                               | 2.59 (0.11, 60.69) | NR                 | 0.86 (0.02, 41.88)  | NR                 | NR                  | 2.59 (0.11, 60.69) | -28 (-44, -12) | NR             | NR            |
| NTPP               | Pravastatin (10mg)                                                              | [Reference]        | [Reference]        | [Reference]         | NR                 | [Reference]         | [Reference]        | [Reference]    | [Reference]    | NR            |
|                    | Pitavastatin (1-2mg)                                                            | 1.05 (0.02, 52.08) | 1.05 (0.02, 52.08) | 1.05 (0.02, 52.08)  | NR                 | 1.05 (0.02, 52.08)  | 1.05 (0.02, 52.08) | -1 (-32, 30)   | -5 (-45, 35)   | NR            |
| Nakamura et al. II | No medication                                                                   | [Reference]        | [Reference]        | [Reference]         | NR                 | [Reference]         | [Reference]        | [Reference]    | [Reference]    | NR            |
|                    | AST-120 (6g)                                                                    | 0.21 (0.04, 1.03)  | 0.34 (0.03, 3.70)  | 0.16 (0.02, 1.43)   | NR                 | 1.00 (<0.01, >100)  | 0.34 (0.03, 3.70)  | -40 (-52, -28) | -29 (-34, -24) | NR            |
| Ntaios et al.      | Placebo                                                                         | [Reference]        | [Reference]        | [Reference]         | NR                 | [Reference]         | [Reference]        | [Reference]    | NR             | NR            |
|                    | Folic acid (5mg)                                                                | 1.00 (0.40, 2.51)  | 0.96 (0.24, 3.84)  | 0.98 (0.28, 3.38)   | NR                 | 1.00 (<0.01, >100)  | 1.00 (<0.01, >100) | -13 (-57, 31)  | NR             | NR            |
| OPAL               | Placebo                                                                         | [Reference]        | [Reference]        | [Reference]         | NR                 | NR                  | NR                 | [Reference]    | [Reference]    | NR            |
|                    | Tibolone (2.5mg)                                                                | 2.06 (0.38, 11.24) | 3.11 (0.32, 29.88) | 1.02 (0.06, 16.28)  | NR                 | NR                  | NR                 | 7 (3, 10)      | 10 (4, 17)     | NR            |
|                    | Estrogen (0.625mg) + Progesterone (2.5mg)                                       | 1.46 (0.24, 8.72)  | 0.96 (0.06, 15.42) | 1.96 (0.18, 21.62)  | NR                 | NR                  | NR                 | 4 (1, 8)       | 5 (-1, 12)     | NR            |
| PART-2             | Placebo                                                                         | [Reference]        | [Reference]        | [Reference]         | NR                 | [Reference]         | [Reference]        | [Reference]    | NR             | NR            |
|                    | Ramipril (5/10mg)                                                               | 0.95 (0.72, 1.26)  | 0.92 (0.69, 1.23)  | 1.76 (0.52, 5.94)   | NR                 | 0.45 (0.20, 1.01)   | 0.64 (0.35, 1.18)  | 3 (-6, 11)     | NR             | NR            |
| PEACE              | Pitavastatin (target LDL-C<100mg/dL)                                            | [Reference]        | [Reference]        | NR                  | NR                 | NR                  | [Reference]        | [Reference]    | [Reference]    | NR            |
|                    | Pitavastatin (target LDL-C<80mg/dL)                                             | 1.01 (0.06, 15.95) | 0.34 (0.01, 8.17)  | NR                  | NR                 | NR                  | 3.02 (0.12, 73.55) | -16 (-46, 14)  | -40 (-95, 15)  | NR            |
| PERFORM            | Aspirin (100mg)                                                                 | [Reference]        | [Reference]        | [Reference]         | [Reference]        | [Reference]         | [Reference]        | [Reference]    | [Reference]    | NR            |
|                    | Terutroban (30mg)                                                               | 1.01 (0.95, 1.08)  | 1.23 (0.98, 1.55)  | 1.02 (0.93, 1.11)   | 0.97 (0.83, 1.12)  | 1.05 (0.90, 1.22)   | 1.01 (0.91, 1.13)  | 11 (-3, 25)    | NR             | NR            |
| PERIOCARDIO        | Usual care                                                                      | [Reference]        | NR                 | NR                  | NR                 | NR                  | NR                 | [Reference]    | [Reference]    | NR            |
|                    | Peridontal therapy                                                              | 1.75 (0.16, 19.27) | NR                 | NR                  | NR                 | NR                  | NR                 | -14 (-33, 5)   | -26 (-51, -2)  | NR            |
| PHOREA             | No medication                                                                   | [Reference]        | [Reference]        | [Reference]         | NR                 | [Reference]         | [Reference]        | NR             | [Reference]    | NR            |
|                    | 17β-estradiol (1mg) + Gestodene (0.025mg on days 17-28)                         | 0.99 (0.02, 49.47) | 0.99 (0.02, 49.47) | 0.99 (0.02, 49.47)  | NR                 | 0.99 (0.02, 49.47)  | 0.99 (0.02, 49.47) | NR             | 22 (-6, 50)    | NR            |
|                    | 17β-estradiol (1mg) + Gestodene (0.025mg on days 17-28 every third cycle)       | 2.94 (0.12, 71.48) | 0.98 (0.02, 49.02) | 2.94 (0.12, 71.48)  | NR                 | 2.94 (0.12, 71.48)  | 2.94 (0.12, 71.48) | NR             | 11 (-15, 37)   | NR            |
| PHYLLIS            | HCTZ (25mg)                                                                     | [Reference]        | [Reference]        | [Reference]         | NR                 | [Reference]         | NR                 | NR             | [Reference]    | NR            |
|                    | Fosinopril (20mg)                                                               | 0.14 (<0.01, 2.74) | 0.14 (<0.01, 2.74) | 1.00 (0.02, 50.01)  | NR                 | 1.00 (0.02, 50.01)  | NR                 | NR             | -2 (-8, 4)     | NR            |
|                    | HCTZ (25mg) + Pravastatin (40mg)                                                | 0.14 (<0.01, 2.76) | 0.14 (<0.01, 2.76) | 1.01 (0.02, 50.41)  | NR                 | 1.01 (0.02, 50.41)  | NR                 | NR             | -3 (-9, 2)     | NR            |
|                    | Fosinopril (20mg) + Pravastatin (40mg)                                          | 0.99 (0.20, 4.82)  | 0.33 (0.03, 3.14)  | 2.98 (0.12, 72.39)  | NR                 | 2.98 (0.12, 72.39)  | NR                 | NR             | -2 (-7, 4)     | NR            |
| PLAC II            | Placebo                                                                         | [Reference]        | [Reference]        | NR                  | NR                 | [Reference]         | [Reference]        | NR             | [Reference]    | NR            |
|                    | Pravastatin (10-40mg)                                                           | 0.41 (0.13, 1.24)  | 0.41 (0.13, 1.24)  | NR                  | NR                 | 1.01 (0.15, 7.01)   | 0.61 (0.15, 2.45)  | NR             | -16 (-31, -2)  | NR            |

|                        |                                   |                    |                    |                     |                    |                    |                    |               |               |               |
|------------------------|-----------------------------------|--------------------|--------------------|---------------------|--------------------|--------------------|--------------------|---------------|---------------|---------------|
| PPAR                   | Placebo                           | [Reference]        | [Reference]        | [Reference]         | NR                 | NR                 | [Reference]        | NR            | NR            | [Reference]   |
|                        | Rosiglitazone (8mg)               | 0.52 (0.20, 1.36)  | 0.60 (0.20, 1.77)  | 0.48 (0.04, 5.21)   | NR                 | NR                 | 0.48 (0.04, 5.21)  | NR            | NR            | -13 (-52, 26) |
| PREDIMED               | Low-fat diet                      | [Reference]        | [Reference]        | [Reference]         | NR                 | [Reference]        | [Reference]        | [Reference]   | [Reference]   | NR            |
|                        | Mediterranean diet + Olive oil    | 0.85 (0.65, 1.11)  | 0.94 (0.60, 1.47)  | 0.81 (0.56, 1.19)   | NR                 | 0.83 (0.50, 1.41)  | 1.00 (0.78, 1.28)  | -10 (-26, 6)  | -18 (-50, 14) | NR            |
|                        | Mediterranean diet + Nuts         | 0.76 (0.57, 1.01)  | 0.81 (0.51, 1.30)  | 0.55 (0.36, 0.85)   | NR                 | 1.03 (0.63, 1.70)  | 1.02 (0.79, 1.31)  | -7 (-24, 10)  | 1 (-32, 34)   | NR            |
| PREVEND IT             | Placebo                           | [Reference]        | [Reference]        | [Reference]         | [Reference]        | [Reference]        | [Reference]        | [Reference]   | NR            | NR            |
|                        | Pravastatin (40mg)                | 0.99 (0.67, 1.46)  | 0.91 (0.56, 1.48)  | 1.18 (0.55, 2.49)   | 0.47 (0.09, 2.58)  | 0.54 (0.13, 2.17)  | 1.13 (0.69, 1.83)  | 0 (-6, 6)     | NR            | NR            |
|                        | Fosinopril (20mg)                 | 0.81 (0.55, 1.20)  | 1.20 (0.73, 1.96)  | 0.53 (0.24, 1.14)   | 0.19 (0.02, 1.65)  | 0.50 (0.12, 1.99)  | 1.04 (0.64, 1.68)  | -4 (-10, 2)   | NR            | NR            |
| PREVENT                | Placebo                           | [Reference]        | [Reference]        | [Reference]         | [Reference]        | NR                 | [Reference]        | NR            | [Reference]   | NR            |
|                        | Amlodipine (10mg)                 | 0.75 (0.59, 0.96)  | 0.74 (0.57, 0.95)  | 0.98 (0.29, 3.35)   | 0.60 (0.44, 0.83)  | NR                 | 0.73 (0.26, 2.10)  | NR            | -19 (-30, -8) | NR            |
| PROBE                  | Non-pioglitazone                  | [Reference]        | NR                 | NR                  | NR                 | NR                 | NR                 | [Reference]   | [Reference]   | NR            |
|                        | Pioglitazone (15-45mg)            | 1.00 (0.36, 2.82)  | NR                 | NR                  | NR                 | NR                 | NR                 | -5 (-19, 10)  | -11 (-31, 8)  | NR            |
| RADIANCE I             | Atorvastatin + Placebo            | [Reference]        | [Reference]        | [Reference]         | NR                 | NR                 | NR                 | [Reference]   | [Reference]   | NR            |
|                        | Atorvastatin + Torcetrapib (60mg) | 1.35 (0.74, 2.45)  | 1.51 (0.77, 2.98)  | 0.91 (0.31, 2.71)   | NR                 | NR                 | NR                 | 4 (0, 8)      | 6 (-2, 14)    | NR            |
| RADIANCE II            | Atorvastatin + Placebo            | [Reference]        | [Reference]        | [Reference]         | NR                 | NR                 | NR                 | [Reference]   | [Reference]   | NR            |
|                        | Atorvastatin + Torcetrapib (60mg) | 1.68 (0.86, 3.27)  | 1.58 (0.74, 3.37)  | 2.03 (0.51, 8.11)   | NR                 | NR                 | NR                 | 4 (-2, 10)    | 0 (-12, 12)   | NR            |
| RAS                    | Placebo                           | [Reference]        | [Reference]        | [Reference]         | NR                 | NR                 | [Reference]        | [Reference]   | NR            | NR            |
|                        | Rosiglitazone (8mg)               | 0.67 (0.11, 3.97)  | 1.00 (0.02, 50.40) | 1.00 (0.02, 50.40)  | NR                 | NR                 | 0.67 (0.11, 3.97)  | -7 (-20, 6)   | NR            | NR            |
| REGRESS                | Placebo                           | [Reference]        | [Reference]        | [Reference]         | [Reference]        | [Reference]        | [Reference]        | [Reference]   | NR            | NR            |
|                        | Pravastatin (40mg)                | 0.61 (0.45, 0.82)  | 0.59 (0.25, 1.42)  | 0.58 (0.14, 2.41)   | 0.62 (0.43, 0.88)  | 0.58 (0.14, 2.41)  | 0.69 (0.22, 2.16)  | -15 (-46, 16) | NR            | NR            |
| REMOVAL                | Placebo                           | [Reference]        | [Reference]        | [Reference]         | [Reference]        | [Reference]        | [Reference]        | [Reference]   | [Reference]   | NR            |
|                        | Metformin (2000mg)                | 1.07 (0.42, 2.73)  | 0.48 (0.12, 1.88)  | 0.95 (0.14, 6.71)   | 1.91 (0.17, 20.89) | 1.91 (0.17, 20.89) | 2.39 (0.47, 12.16) | -5 (-12, 2)   | -13 (-18, -8) | NR            |
| RIS                    | Usual care                        | [Reference]        | [Reference]        | [Reference]         | NR                 | [Reference]        | [Reference]        | [Reference]   | [Reference]   | NR            |
|                        | Intensified care                  | 0.77 (0.43, 1.37)  | 0.92 (0.46, 1.84)  | 0.45 (0.16, 1.30)   | NR                 | 0.35 (0.04, 3.32)  | 0.45 (0.21, 0.95)  | 6 (-7, 20)    | 2 (-15, 18)   | NR            |
| SANDS                  | Standard care                     | [Reference]        | [Reference]        | [Reference]         | [Reference]        | [Reference]        | [Reference]        | [Reference]   | NR            | NR            |
|                        | Intensified care                  | 1.23 (0.49, 3.05)  | 1.96 (0.36, 10.61) | 0.98 (0.06, 15.58)  | 0.98 (0.25, 3.88)  | 0.98 (0.06, 15.58) | 0.59 (0.14, 2.43)  | -17 (-27, -7) | NR            | NR            |
| SCIMO                  | Placebo                           | [Reference]        | [Reference]        | [Reference]         | [Reference]        | [Reference]        | [Reference]        | NR            | [Reference]   | NR            |
|                        | ω3 fatty acids (1.65g)            | 0.89 (0.56, 1.41)  | 0.25 (0.03, 2.18)  | 0.33 (0.03, 3.13)   | 1.08 (0.65, 1.81)  | 0.33 (0.01, 8.02)  | 0.50 (0.05, 5.39)  | NR            | 10 (-10, 30)  | NR            |
| SECURE                 | Placebo                           | [Reference]        | [Reference]        | [Reference]         | NR                 | [Reference]        | [Reference]        | NR            | [Reference]   | NR            |
|                        | Ramipril (10 or 2.5mg)            | 0.86 (0.57, 1.28)  | 0.92 (0.58, 1.45)  | 0.67 (0.28, 1.59)   | NR                 | 1.00 (0.18, 5.43)  | 1.06 (0.51, 2.19)  | NR            | -3 (-12, 7)   | NR            |
|                        | Vitamin E (400IU)                 | 1.12 (0.76, 1.65)  | 1.01 (0.66, 1.56)  | 1.94 (0.78, 4.81)   | NR                 | 0.19 (0.02, 1.66)  | 0.60 (0.30, 1.22)  | NR            | 0 (-9, 9)     | NR            |
| SEKONA                 | Usual care                        | [Reference]        | [Reference]        | [Reference]         | [Reference]        | NR                 | [Reference]        | [Reference]   | NR            | NR            |
|                        | Intensified care                  | 0.81 (0.57, 1.14)  | 0.76 (0.51, 1.14)  | 0.81 (0.14, 4.81)   | 0.58 (0.41, 0.84)  | NR                 | 1.08 (0.42, 2.76)  | -23 (-42, -5) | NR            | NR            |
| SENDCAP                | Placebo                           | [Reference]        | [Reference]        | NR                  | NR                 | NR                 | NR                 | NR            | [Reference]   | NR            |
|                        | Bezafibrate (400mg)               | 0.34 (0.04, 3.22)  | 0.34 (0.04, 3.22)  | NR                  | NR                 | NR                 | NR                 | NR            | 1 (-19, 22)   | NR            |
| SPEAD-A                | Conventional treatment            | [Reference]        | [Reference]        | [Reference]         | [Reference]        | [Reference]        | [Reference]        | [Reference]   | [Reference]   | NR            |
|                        | Alogliptin (25mg)                 | 0.11 (<0.01, 2.05) | 0.20 (<0.01, 4.13) | 0.33 (0.01, 8.12)   | 0.33 (0.01, 8.12)  | 1.00 (0.02, 50.09) | 1.00 (0.02, 50.09) | -15 (-28, -2) | -28 (-53, -3) | NR            |
| SPIKE                  | Conventional treatment            | [Reference]        | [Reference]        | [Reference]         | NR                 | NR                 | [Reference]        | [Reference]   | [Reference]   | NR            |
|                        | Sitagliptin (25-100mg)            | 1.00 (0.21, 4.87)  | 1.00 (0.06, 15.83) | 2.00 (0.18, 21.80)  | NR                 | NR                 | 0.33 (0.01, 8.11)  | -27 (-45, -8) | -17 (-33, 0)  | NR            |
| STARR                  | Placebo                           | [Reference]        | [Reference]        | [Reference]         | NR                 | [Reference]        | [Reference]        | [Reference]   | [Reference]   | NR            |
|                        | Ramipril (15mg)                   | 1.31 (0.64, 2.69)  | 1.30 (0.57, 2.96)  | 1.33 (0.30, 5.95)   | NR                 | 1.00 (<0.01, >100) | 0.60 (0.14, 2.50)  | -5 (-10, -1)  | -5 (-10, -1)  | NR            |
|                        | Rosiglitazone (8mg)               | 0.86 (0.42, 1.76)  | 0.90 (0.40, 2.05)  | 0.73 (0.16, 3.28)   | NR                 | 1.00 (<0.01, >100) | 0.33 (0.07, 1.62)  | -3 (-7, 1)    | -3 (-8, 1)    | NR            |
| STOP-NIDDM             | Placebo                           | [Reference]        | [Reference]        | [Reference]         | [Reference]        | [Reference]        | NR                 | [Reference]   | NR            | NR            |
|                        | Acarbose (300mg)                  | 0.47 (0.26, 0.86)  | 0.08 (0.01, 0.64)  | 0.50 (0.09, 2.74)   | 0.55 (0.27, 1.15)  | 0.50 (0.05, 5.53)  | NR                 | -6 (-11, -1)  | NR            | NR            |
| Safarova et al.        | Atorvastatin                      | [Reference]        | [Reference]        | [Reference]         | [Reference]        | [Reference]        | [Reference]        | [Reference]   | NR            | NR            |
|                        | Atorvastatin + Niacin (1500mg)    | 0.72 (0.38, 1.34)  | 0.70 (0.37, 1.33)  | <0.01 (<0.01, >100) | 0.34 (0.09, 1.32)  | 1.00 (<0.01, >100) | 2.41 (0.22, 26.92) | -12 (-99, 76) | NR            | NR            |
| Sander et al. (Cp neg) | Placebo                           | [Reference]        | [Reference]        | [Reference]         | NR                 | NR                 | [Reference]        | [Reference]   | NR            | NR            |



|                        |                                     |                    |                    |                    |                    |                    |                    |                  |    |               |
|------------------------|-------------------------------------|--------------------|--------------------|--------------------|--------------------|--------------------|--------------------|------------------|----|---------------|
|                        | Roxithromycin (300mg)               | 0.79 (0.22, 2.82)  | 0.99 (0.06, 15.48) | 0.66 (0.11, 3.82)  | NR                 | NR                 | 0.99 (0.14, 6.82)  | -10 (-43, 23)    | NR | NR            |
| Sander et al. (Cp pos) | Placebo                             | [Reference]        | [Reference]        | [Reference]        | NR                 | NR                 | [Reference]        | [Reference]      | NR | NR            |
|                        | Roxithromycin (300mg)               | 1.13 (0.49, 2.59)  | 1.02 (0.06, 15.89) | 0.73 (0.24, 2.16)  | NR                 | NR                 | 0.68 (0.12, 3.92)  | -40 (-70, -10)   | NR | NR            |
| Spring et al.          | Standard statin treatment           | [Reference]        | [Reference]        | [Reference]        | NR                 | [Reference]        | NR                 | [Reference]      | NR | NR            |
|                        | Atorvastatin (80mg)                 | 1.08 (0.07, 16.84) | 1.08 (0.07, 16.84) | 1.08 (0.02, 53.54) | NR                 | 1.08 (0.02, 53.54) | NR                 | -40 (-404, 324)  | NR | NR            |
| Stanley et al.         | Placebo                             | [Reference]        | [Reference]        | [Reference]        | NR                 | [Reference]        | [Reference]        | [Reference]      | NR | NR            |
|                        | Tesamorelin (2mg)                   | 0.26 (0.01, 6.12)  | 0.79 (0.02, 38.05) | 0.26 (0.01, 6.12)  | NR                 | 0.79 (0.02, 38.05) | 0.79 (0.02, 38.05) | -60 (-150, 30)   | NR | NR            |
| Stanton et al.         | Amlodipine (5-10mg)                 | [Reference]        | [Reference]        | [Reference]        | NR                 | [Reference]        | [Reference]        | [Reference]      | NR | NR            |
|                        | Lisinopril (5-20mg)                 | 0.34 (0.01, 8.13)  | 1.03 (0.02, 50.42) | 0.34 (0.01, 8.13)  | NR                 | 1.03 (0.02, 50.42) | 1.03 (0.02, 50.42) | 21 (1, 41)       | NR | NR            |
| TART                   | Placebo                             | [Reference]        | [Reference]        | [Reference]        | NR                 | NR                 | NR                 | [Reference]      | NR | NR            |
|                        | Troglitazone (400mg)                | 1.01 (0.33, 3.05)  | 1.34 (0.31, 5.89)  | 0.67 (0.11, 3.96)  | NR                 | NR                 | NR                 | -4 (-9, 2)       | NR | NR            |
| TEAAM                  | Placebo                             | [Reference]        | [Reference]        | [Reference]        | [Reference]        | [Reference]        | [Reference]        | [Reference]      | NR | NR            |
|                        | Testosterone (75mg)                 | 2.92 (0.96, 8.86)  | 1.46 (0.25, 8.62)  | 6.82 (0.36, >100)  | 2.44 (0.48, 12.36) | 2.92 (0.12, 71.18) | 0.65 (0.11, 3.83)  | 0 (-3, 3)        | NR | NR            |
| TRIPOD                 | Placebo                             | [Reference]        | [Reference]        | [Reference]        | NR                 | [Reference]        | NR                 | [Reference]      | NR | NR            |
|                        | Troglitazone (400mg)                | 1.00 (0.02, 50.03) | 1.00 (0.02, 50.03) | 1.00 (0.02, 50.03) | NR                 | 1.00 (0.02, 50.03) | NR                 | -3 (-6, -0)      | NR | NR            |
| Tasic et al.           | Atenolol (50mg)                     | [Reference]        | [Reference]        | [Reference]        | NR                 | [Reference]        | [Reference]        | [Reference]      | NR | NR            |
|                        | Fosinopril (20mg)                   | 0.50 (0.10, 2.43)  | 0.67 (0.12, 3.57)  | 0.33 (0.01, 7.70)  | NR                 | 1.00 (0.02, 47.98) | 1.00 (0.02, 47.98) | -141 (-219, -63) | NR | NR            |
| VEAPS                  | Placebo                             | [Reference]        | [Reference]        | [Reference]        | [Reference]        | [Reference]        | [Reference]        | [Reference]      | NR | NR            |
|                        | DL- $\alpha$ -tocopherol (400IU)    | 0.80 (0.32, 1.97)  | 0.99 (0.36, 2.78)  | 0.20 (<0.01, 4.11) | 0.50 (0.09, 2.68)  | 0.99 (0.06, 15.77) | 1.99 (0.18, 21.73) | 2 (-0, 4)        | NR | NR            |
| VHAS                   | Chlorthalidone (25mg)               | [Reference]        | [Reference]        | [Reference]        | [Reference]        | [Reference]        | [Reference]        | NR               | NR | [Reference]   |
|                        | Verapamil (240mg)                   | 1.06 (0.54, 2.09)  | 0.89 (0.34, 2.29)  | 1.25 (0.34, 4.64)  | 1.33 (0.30, 5.94)  | 1.25 (0.34, 4.64)  | 1.25 (0.34, 4.64)  | NR               | NR | -1 (-15, 13)  |
| VIP                    | Withdrawal of mycophenolate mofetil | [Reference]        | [Reference]        | [Reference]        | NR                 | NR                 | [Reference]        | [Reference]      | NR | NR            |
|                        | Withdrawal of calcineurin inhibitor | 0.44 (0.12, 1.61)  | 0.34 (0.04, 3.17)  | 1.02 (0.02, 50.42) | NR                 | NR                 | 0.51 (0.10, 2.67)  | -3 (-11, 6)      | NR | NR            |
| VITAL                  | Usual care                          | [Reference]        | [Reference]        | [Reference]        | [Reference]        | [Reference]        | [Reference]        | [Reference]      | NR | NR            |
|                        | Intensified care                    | 1.41 (0.45, 4.46)  | 1.53 (0.25, 9.13)  | 1.00 (<0.01, >100) | 1.01 (0.25, 4.05)  | >100 (<0.01, >100) | >100 (<0.01, >100) | 16 (-11, 44)     | NR | NR            |
| WISH                   | Placebo                             | [Reference]        | [Reference]        | [Reference]        | NR                 | [Reference]        | [Reference]        | [Reference]      | NR | NR            |
|                        | Isoflavone Soy Protein (25g)        | 3.00 (0.12, 73.14) | 1.00 (0.02, 50.12) | 3.00 (0.12, 73.14) | NR                 | 1.00 (0.02, 50.12) | 1.00 (0.02, 50.12) | -1 (-3, 1)       | NR | NR            |
| Yang et al.            | Control                             | [Reference]        | [Reference]        | [Reference]        | NR                 | [Reference]        | [Reference]        | NR               | NR | [Reference]   |
|                        | Puerarin (400mg)                    | 0.98 (0.02, 48.75) | 0.98 (0.02, 48.75) | 0.98 (0.02, 48.75) | NR                 | 0.98 (0.02, 48.75) | 0.98 (0.02, 48.75) | NR               | NR | -48 (-93, -2) |
| Yun et al.             | Control                             | [Reference]        | [Reference]        | [Reference]        | NR                 | [Reference]        | NR                 | [Reference]      | NR | NR            |
|                        | Acarbose (150mg)                    | 0.47 (0.21, 1.05)  | 0.30 (0.07, 1.41)  | 0.53 (0.10, 2.81)  | NR                 | 0.64 (0.16, 2.56)  | NR                 | -38 (-42, -34)   | NR | NR            |
| Zou et al.             | Lutein (20mg)                       | [Reference]        | [Reference]        | [Reference]        | NR                 | [Reference]        | NR                 | [Reference]      | NR | NR            |
|                        | Lutein (20mg) + Lycopene (20mg)     | 1.00 (0.02, 49.38) | 1.00 (0.02, 49.38) | 1.00 (0.02, 49.38) | NR                 | 1.00 (0.02, 49.38) | NR                 | -38 (-92, 16)    | NR | NR            |

Abbreviations: CCA-IMT=intima-media thickness of the common-carotid-artery. CI=confidence interval. CVD=cardiovascular disease. DASH=dietary approaches to stop hypertension. HCTZ=hydrochlorothiazide. LDL-C=low-density lipoprotein cholesterol. MI=myocardial infarction. NR=not reported. RR=relative risk. **Table V in the Supplement** provides full names of the contributing trials. [Reference] indicates reference group.

## Supplemental Table V. Full names and links to publications of contributing trials

| Trial acronym    | Full trial name                                                                                                                                       | Link                                                                                                                                                                                                                                                                                                                                        |
|------------------|-------------------------------------------------------------------------------------------------------------------------------------------------------|---------------------------------------------------------------------------------------------------------------------------------------------------------------------------------------------------------------------------------------------------------------------------------------------------------------------------------------------|
| ACAPS            | Asymptomatic Carotid Artery Progression Study                                                                                                         | <a href="https://doi.org/10.1016/0197-2456(92)90012-o">https://doi.org/10.1016/0197-2456(92)90012-o</a><br><a href="https://doi.org/10.1161/01.CIR.90.4.1679">https://doi.org/10.1161/01.CIR.90.4.1679</a>                                                                                                                                  |
| ACT NOW          | Actos Now for Prevention of Diabetes Study                                                                                                            | <a href="https://doi.org/10.1056/NEJMoa1010949">https://doi.org/10.1056/NEJMoa1010949</a><br><a href="https://doi.org/10.1161/ATVBAHA.112.300346">https://doi.org/10.1161/ATVBAHA.112.300346</a>                                                                                                                                            |
| ALLO-IMT         | ALLO-IMT Study                                                                                                                                        | <a href="https://doi.org/10.1136/heartjnl-2014-305683">https://doi.org/10.1136/heartjnl-2014-305683</a>                                                                                                                                                                                                                                     |
| AMAR             | Atherosclerosis Monitoring and Atherogenicity Reduction Study                                                                                         | <a href="https://www.ncbi.nlm.nih.gov/pmc/articles/PMC4637943/">https://www.ncbi.nlm.nih.gov/pmc/articles/PMC4637943/</a>                                                                                                                                                                                                                   |
| ARBITER          | Arterial Biology for the Investigation of the Treatment Effects of Reducing Cholesterol Trial                                                         | <a href="https://doi.org/10.1161/01.CIR.0000034508.55617.65">https://doi.org/10.1161/01.CIR.0000034508.55617.65</a>                                                                                                                                                                                                                         |
| ARBITER 2        | Arterial Biology for the Investigation of the Treatment Effects of Reducing Cholesterol Trial 2                                                       | <a href="https://doi.org/10.1161/01.CIR.0000148955.19792.8D">https://doi.org/10.1161/01.CIR.0000148955.19792.8D</a>                                                                                                                                                                                                                         |
| ARBITER 6-HALTS  | Arterial Biology for the Investigation of the Treatment Effects of Reducing Cholesterol 6 - HDL and LDL Treatment Strategies in Atherosclerosis Trial | <a href="https://doi.org/10.1007/s10557-007-6020-8">https://doi.org/10.1007/s10557-007-6020-8</a><br><a href="https://doi.org/10.1056/NEJMoa0907569">https://doi.org/10.1056/NEJMoa0907569</a><br><a href="https://doi.org/10.1016/j.jacc.2010.03.017">https://doi.org/10.1016/j.jacc.2010.03.017</a>                                       |
| ARTSTIFF         | Effect of Olmesartan Medoxomil on Arterial Stiffness and Thickness in Subjects With Metabolic Syndrome Study                                          | <a href="https://doi.org/10.1161/HYPERTENSIONAHA.114.03282">https://doi.org/10.1161/HYPERTENSIONAHA.114.03282</a>                                                                                                                                                                                                                           |
| ASAP-FINLAND     | Antioxidant Supplementation in Atherosclerosis Prevention Study                                                                                       | <a href="https://doi.org/10.1046/j.1365-2796.2000.00752.x">https://doi.org/10.1046/j.1365-2796.2000.00752.x</a><br><a href="https://doi.org/10.1161/01.ATV.20.12.2677">https://doi.org/10.1161/01.ATV.20.12.2677</a><br><a href="https://doi.org/10.1161/01.CIR.0000050626.25057.51">https://doi.org/10.1161/01.CIR.0000050626.25057.51</a> |
| ASAP-NL          | Atorvastatin vs Simvastatin on Atherosclerosis Progression Study                                                                                      | <a href="https://doi.org/10.2165/00044011-200020020-00001">https://doi.org/10.2165/00044011-200020020-00001</a><br><a href="https://doi.org/10.1016/S0140-6736(00)04053-8">https://doi.org/10.1016/S0140-6736(00)04053-8</a>                                                                                                                |
| ASFAST           | Atherosclerosis and Folic Acid Supplementation Trial                                                                                                  | <a href="https://doi.org/10.1016/j.jacc.2005.10.064">https://doi.org/10.1016/j.jacc.2005.10.064</a>                                                                                                                                                                                                                                         |
| ATIC             | Anti-Oxidant Therapy in Chronic Renal Insufficiency Study                                                                                             | <a href="https://doi.org/10.1001/archinte.167.12.1262">https://doi.org/10.1001/archinte.167.12.1262</a><br><a href="https://doi.org/10.1111/j.1523-1755.2005.00680.x">https://doi.org/10.1111/j.1523-1755.2005.00680.x</a>                                                                                                                  |
| Ahn et al.       | Ahn et al.                                                                                                                                            | <a href="https://doi.org/10.1007/s00380-010-0093-1">https://doi.org/10.1007/s00380-010-0093-1</a>                                                                                                                                                                                                                                           |
| Andrews et al.   | Andrews et al.                                                                                                                                        | <a href="https://doi.org/10.1371/journal.pone.0205831">https://doi.org/10.1371/journal.pone.0205831</a><br><a href="https://doi.org/10.1681/ASN.2016050521">https://doi.org/10.1681/ASN.2016050521</a>                                                                                                                                      |
| BCAPS            | Beta-Blocker Cholesterol-Lowering Asymptomatic Plaque Study                                                                                           | <a href="https://doi.org/10.1161/01.CIR.103.13.1721">https://doi.org/10.1161/01.CIR.103.13.1721</a>                                                                                                                                                                                                                                         |
| BKREGISTRY-II    | BK Registry II Study                                                                                                                                  | <a href="https://doi.org/10.1177/107424840400900306">https://doi.org/10.1177/107424840400900306</a>                                                                                                                                                                                                                                         |
| BVAIT            | B-Vitamin Atherosclerosis Intervention Trial                                                                                                          | <a href="https://doi.org/10.1161/STROKEAHA.108.526798">https://doi.org/10.1161/STROKEAHA.108.526798</a>                                                                                                                                                                                                                                     |
| CAIUS            | Carotid Atherosclerosis Italian Ultrasound Study                                                                                                      | <a href="https://doi.org/10.1016/S0002-9343(96)00333-6">https://doi.org/10.1016/S0002-9343(96)00333-6</a>                                                                                                                                                                                                                                   |
| CAMERA           | Carotid Atherosclerosis - Metformin for Insulin Resistance Study                                                                                      | <a href="https://doi.org/10.1016/S2213-8587(13)70152-9">https://doi.org/10.1016/S2213-8587(13)70152-9</a>                                                                                                                                                                                                                                   |
| CAPPA            | Cilostazol versus Aspirin for Primary Prevention of Atherosclerotic Events                                                                            | <a href="https://doi.org/10.1007/s00380-019-01421-1">https://doi.org/10.1007/s00380-019-01421-1</a>                                                                                                                                                                                                                                         |
| CAPTIVATE        | Carotid Atherosclerosis Progression Trial Investigating Vascular ACAT Inhibition Treatment Effects                                                    | <a href="https://doi.org/10.1001/jama.301.11.1131">https://doi.org/10.1001/jama.301.11.1131</a>                                                                                                                                                                                                                                             |
| CERDIA           | Cerivastatin in Diabetes Trial                                                                                                                        | <a href="https://doi.org/10.2337/diacare.27.12.2887">https://doi.org/10.2337/diacare.27.12.2887</a>                                                                                                                                                                                                                                         |
| CHICAGO          | Carotid Intima-Media Thickness in Atherosclerosis Using Pioglitazone Trial                                                                            | <a href="https://doi.org/10.1001/jama.296.21.joc60158">https://doi.org/10.1001/jama.296.21.joc60158</a>                                                                                                                                                                                                                                     |
| CIMT phase 1     | Copenhagen Insulin and Metformin Therapy Trial                                                                                                        | <a href="https://doi.org/10.1136/bmjopen-2015-008376">https://doi.org/10.1136/bmjopen-2015-008376</a><br><a href="https://doi.org/10.1111/j.1463-1326.2008.00959.x">https://doi.org/10.1111/j.1463-1326.2008.00959.x</a>                                                                                                                    |
| CLAS             | Cholesterol Lowering Atherosclerosis Study                                                                                                            | <a href="https://doi.org/10.1161/01.CIR.88.1.20">https://doi.org/10.1161/01.CIR.88.1.20</a><br><a href="https://doi.org/10.1161/01.CIR.93.1.34">https://doi.org/10.1161/01.CIR.93.1.34</a><br><a href="https://doi.org/10.1001/jama.1990.03450230049028">https://doi.org/10.1001/jama.1990.03450230049028</a>                               |
| CONTRAST         | Convective Transport Study                                                                                                                            | <a href="https://doi.org/10.1186/1468-6708-6-8">https://doi.org/10.1186/1468-6708-6-8</a><br><a href="https://doi.org/10.1681/ASN.2011121140">https://doi.org/10.1681/ASN.2011121140</a>                                                                                                                                                    |
| Cao et al.       | Cao et al.                                                                                                                                            | <a href="https://doi.org/10.11909/j.issn.1671-5411.2015.04.014">https://doi.org/10.11909/j.issn.1671-5411.2015.04.014</a>                                                                                                                                                                                                                   |
| DAPC             | Diabetic Atherosclerosis Prevention by Cilostazol                                                                                                     | <a href="https://doi.org/10.1161/CIRCULATIONAHA.109.892414">https://doi.org/10.1161/CIRCULATIONAHA.109.892414</a><br><a href="https://doi.org/10.1186/1475-2840-5-16">https://doi.org/10.1186/1475-2840-5-16</a>                                                                                                                            |
| DAPHNE           | Doxazosin Atherosclerosis Progression Study in Hypertensives in the Netherlands                                                                       | <a href="https://pubmed.ncbi.nlm.nih.gov/12572707">https://pubmed.ncbi.nlm.nih.gov/12572707</a>                                                                                                                                                                                                                                             |
| DOIT             | Diet and Omega-3 Fatty Acid Intervention Trial                                                                                                        | <a href="https://doi.org/10.1016/j.numecd.2008.01.006">https://doi.org/10.1016/j.numecd.2008.01.006</a>                                                                                                                                                                                                                                     |
| EGE STUDY        | Ege Study                                                                                                                                             | <a href="https://doi.org/10.1681/ASN.2012090908">https://doi.org/10.1681/ASN.2012090908</a><br><a href="https://doi.org/10.5414/CN108251">https://doi.org/10.5414/CN108251</a>                                                                                                                                                              |
| ELITE (early MP) | Early versus Late Intervention Trial with Estradiol (early menopause)                                                                                 | <a href="https://doi.org/10.1097/GME.0000000000000343">https://doi.org/10.1097/GME.0000000000000343</a><br><a href="https://doi.org/10.1056/NEJMoa1505241">https://doi.org/10.1056/NEJMoa1505241</a>                                                                                                                                        |
| ELITE (late MP)  | Early versus Late Intervention Trial with Estradiol (late menopause)                                                                                  | <a href="https://doi.org/10.1097/GME.0000000000000343">https://doi.org/10.1097/GME.0000000000000343</a><br><a href="https://doi.org/10.1056/NEJMoa1505241">https://doi.org/10.1056/NEJMoa1505241</a>                                                                                                                                        |
| ELSA             | European Lacidipine Study on Atherosclerosis                                                                                                          | <a href="https://doi.org/10.1161/01.CIR.0000039288.86470.DD">https://doi.org/10.1161/01.CIR.0000039288.86470.DD</a>                                                                                                                                                                                                                         |

|                   |                                                                                                                                                            |                                                                                                                                                                                                                                                                                                                                                                                                                                                                                                                                                                                                                                              |
|-------------------|------------------------------------------------------------------------------------------------------------------------------------------------------------|----------------------------------------------------------------------------------------------------------------------------------------------------------------------------------------------------------------------------------------------------------------------------------------------------------------------------------------------------------------------------------------------------------------------------------------------------------------------------------------------------------------------------------------------------------------------------------------------------------------------------------------------|
| ELVA              | Effect of Long-Term Treatment of Metoprolol CR/XL on Surrogate Variables for Atherosclerotic Disease                                                       | <a href="https://doi.org/10.1161/hs0202.102332">https://doi.org/10.1161/hs0202.102332</a>                                                                                                                                                                                                                                                                                                                                                                                                                                                                                                                                                    |
| ENCORE            | Exercise and Nutritional Interventions for Cardiovascular Health Study                                                                                     | <a href="https://doi.org/10.1001/archinternmed.2009.470">https://doi.org/10.1001/archinternmed.2009.470</a><br><a href="https://doi.org/10.1161/HYPERTENSIONAHA.109.146795">https://doi.org/10.1161/HYPERTENSIONAHA.109.146795</a>                                                                                                                                                                                                                                                                                                                                                                                                           |
| ENHANCE           | Ezetimibe and Simvastatin in Hypercholesterolemia Enhances Atherosclerosis Regression Trial                                                                | <a href="https://doi.org/10.1056/NEJMoa0800742">https://doi.org/10.1056/NEJMoa0800742</a>                                                                                                                                                                                                                                                                                                                                                                                                                                                                                                                                                    |
| EPAT              | Estrogen in the Prevention of Atherosclerosis Trial                                                                                                        | <a href="https://doi.org/10.7326/0003-4819-135-11-200112040-00005">https://doi.org/10.7326/0003-4819-135-11-200112040-00005</a>                                                                                                                                                                                                                                                                                                                                                                                                                                                                                                              |
| FIELD             | Fenofibrate Intervention and Event Lowering in Diabetes Study - Helsinki Cohort                                                                            | <a href="https://doi.org/10.1016/S0140-6736(05)67667-2">https://doi.org/10.1016/S0140-6736(05)67667-2</a><br><a href="https://doi.org/10.1016/j.jacc.2008.09.049">https://doi.org/10.1016/j.jacc.2008.09.049</a>                                                                                                                                                                                                                                                                                                                                                                                                                             |
| FIRST             | Evaluation of Choline Fenofibrate (ABT-335) on cIMT in Subjects with Type IIb Dyslipidemia with Residual Risk in Addition to Atorvastatin Therapy Trial    | <a href="https://doi.org/10.1007/s10557-012-6395-z">https://doi.org/10.1007/s10557-012-6395-z</a><br><a href="https://doi.org/10.1161/ATVBAHA.113.302926">https://doi.org/10.1161/ATVBAHA.113.302926</a>                                                                                                                                                                                                                                                                                                                                                                                                                                     |
| FRANCIS           | Franciscus Rheumatoid Arthritis and Cardiovascular Intervention Study                                                                                      | <a href="https://doi.org/10.1136/annrheumdis-2018-214075">https://doi.org/10.1136/annrheumdis-2018-214075</a><br><a href="https://doi.org/10.1016/j.atherosclerosis.2018.02.019">https://doi.org/10.1016/j.atherosclerosis.2018.02.019</a>                                                                                                                                                                                                                                                                                                                                                                                                   |
| GRACE             | Glucose Reduction and Atherosclerosis Continuing Evaluation Study                                                                                          | <a href="https://doi.org/10.2337/dc12-2129">https://doi.org/10.2337/dc12-2129</a>                                                                                                                                                                                                                                                                                                                                                                                                                                                                                                                                                            |
| Gresele et al.    | Gresele et al.                                                                                                                                             | <a href="https://doi.org/10.1016/j.jvs.2012.05.064">https://doi.org/10.1016/j.jvs.2012.05.064</a>                                                                                                                                                                                                                                                                                                                                                                                                                                                                                                                                            |
| HART              | Homocysteine and Atherosclerosis Reduction Trial                                                                                                           | <a href="https://doi.org/10.1177/1358863X08092102">https://doi.org/10.1177/1358863X08092102</a>                                                                                                                                                                                                                                                                                                                                                                                                                                                                                                                                              |
| HERS              | Heart and Estrogen/Progestin Replacement Study                                                                                                             | <a href="https://doi.org/10.1161/01.atv.0000033514.79653.04">https://doi.org/10.1161/01.atv.0000033514.79653.04</a><br><a href="https://doi.org/10.1001/jama.280.7.605">https://doi.org/10.1001/jama.280.7.605</a>                                                                                                                                                                                                                                                                                                                                                                                                                           |
| HYRIM             | Hypertension High Risk Management Study                                                                                                                    | <a href="https://doi.org/10.1016/j.atherosclerosis.2004.08.033">https://doi.org/10.1016/j.atherosclerosis.2004.08.033</a>                                                                                                                                                                                                                                                                                                                                                                                                                                                                                                                    |
| INSIGHT           | International Nifedipine GITS Study: Intervention as a Goal in Hypertension Treatment - France Cohort                                                      | <a href="https://doi.org/10.1161/01.CIR.103.24.2949">https://doi.org/10.1161/01.CIR.103.24.2949</a><br><a href="https://doi.org/10.1016/S0140-6736(00)02527-7">https://doi.org/10.1016/S0140-6736(00)02527-7</a><br><a href="https://doi.org/10.2165/00003495-200363140-00001">https://doi.org/10.2165/00003495-200363140-00001</a><br><a href="https://doi.org/10.1161/STROKEAHA.119.024968">https://doi.org/10.1161/STROKEAHA.119.024968</a><br><a href="https://doi.org/10.5551/jat.41533">https://doi.org/10.5551/jat.41533</a>                                                                                                          |
| J-STARS           | Japan Statin Treatment Against Recurrent Stroke                                                                                                            | <a href="https://doi.org/10.1161/STROKEAHA.117.018387">https://doi.org/10.1161/STROKEAHA.117.018387</a><br><a href="https://doi.org/10.1016/j.jstrokecerebrovasdis.2016.11.113">https://doi.org/10.1016/j.jstrokecerebrovasdis.2016.11.113</a><br><a href="https://doi.org/10.1016/j.ebiom.2015.08.006">https://doi.org/10.1016/j.ebiom.2015.08.006</a>                                                                                                                                                                                                                                                                                      |
| JART              | Effect of Losartan and Amlodipine on Left Ventricular Diastolic Function and Atherosclerosis in Japanese Patients with Mild-to-Moderate Hypertension Study | <a href="https://doi.org/10.1253/circj.CJ-11-0887">https://doi.org/10.1253/circj.CJ-11-0887</a>                                                                                                                                                                                                                                                                                                                                                                                                                                                                                                                                              |
| KAPS              | Kuopio Atherosclerosis Prevention Study                                                                                                                    | <a href="https://doi.org/10.1161/01.CIR.92.7.1758">https://doi.org/10.1161/01.CIR.92.7.1758</a>                                                                                                                                                                                                                                                                                                                                                                                                                                                                                                                                              |
| KEEPS             | Kronos Early Estrogen Prevention Study                                                                                                                     | <a href="https://doi.org/10.7326/M14-0353">https://doi.org/10.7326/M14-0353</a>                                                                                                                                                                                                                                                                                                                                                                                                                                                                                                                                                              |
| KIMVASC           | KIMVASC Study                                                                                                                                              | <a href="https://doi.org/10.1007/s12603-015-0619-4">https://doi.org/10.1007/s12603-015-0619-4</a>                                                                                                                                                                                                                                                                                                                                                                                                                                                                                                                                            |
| Katakami et al.   | Katakami et al.                                                                                                                                            | <a href="https://doi.org/10.1007/s00125-004-1547-8">https://doi.org/10.1007/s00125-004-1547-8</a>                                                                                                                                                                                                                                                                                                                                                                                                                                                                                                                                            |
| Koyasu et al.     | Koyasu et al.                                                                                                                                              | <a href="https://doi.org/10.1016/j.clinthera.2010.07.015">https://doi.org/10.1016/j.clinthera.2010.07.015</a>                                                                                                                                                                                                                                                                                                                                                                                                                                                                                                                                |
| LAARS             | Losartan Vascular Regression Study                                                                                                                         | <a href="https://doi.org/10.1016/S0149-2918(02)80028-5">https://doi.org/10.1016/S0149-2918(02)80028-5</a>                                                                                                                                                                                                                                                                                                                                                                                                                                                                                                                                    |
| LIFE-ICARUS       | Losartan Intervention For Endpoint Reduction in Hypertension - Insulin Carotids US Scandinavia Study                                                       | <a href="https://doi.org/10.1097/01.hjh.0000163160.60234.15">https://doi.org/10.1097/01.hjh.0000163160.60234.15</a>                                                                                                                                                                                                                                                                                                                                                                                                                                                                                                                          |
| LIPID             | Long-term Intervention with Pravastatin in Ischemic Disease Trial                                                                                          | <a href="https://doi.org/10.1161/01.CIR.97.18.1784">https://doi.org/10.1161/01.CIR.97.18.1784</a><br><a href="https://doi.org/10.1016/S0002-9149(99)80133-7">https://doi.org/10.1016/S0002-9149(99)80133-7</a><br><a href="https://doi.org/10.1056/NEJM199811053391902">https://doi.org/10.1056/NEJM199811053391902</a><br><a href="https://doi.org/10.1016/j.ehj.2003.12.024">https://doi.org/10.1016/j.ehj.2003.12.024</a><br><a href="https://doi.org/10.1016/j.ijcard.2014.06.016">https://doi.org/10.1016/j.ijcard.2014.06.016</a><br><a href="https://doi.org/10.1016/j.cct.2011.11.011">https://doi.org/10.1016/j.cct.2011.11.011</a> |
| Luijendijk et al. | Luijendijk et al.                                                                                                                                          | <a href="https://doi.org/10.1016/j.ijcard.2014.06.016">https://doi.org/10.1016/j.ijcard.2014.06.016</a><br><a href="https://doi.org/10.1016/j.cct.2011.11.011">https://doi.org/10.1016/j.cct.2011.11.011</a>                                                                                                                                                                                                                                                                                                                                                                                                                                 |
| MARS              | Monitored Atherosclerosis Regression Study                                                                                                                 | <a href="https://doi.org/10.7326/0003-4819-119-10-199311150-00002">https://doi.org/10.7326/0003-4819-119-10-199311150-00002</a><br><a href="https://doi.org/10.7326/0003-4819-124-6-199603150-00002">https://doi.org/10.7326/0003-4819-124-6-199603150-00002</a>                                                                                                                                                                                                                                                                                                                                                                             |
| MAVET             | Melbourne Atherosclerosis Vitamin E Trial                                                                                                                  | <a href="https://doi.org/10.1097/01.hjr.0000219108.10167.46">https://doi.org/10.1097/01.hjr.0000219108.10167.46</a>                                                                                                                                                                                                                                                                                                                                                                                                                                                                                                                          |
| MECANO            | Minimization of maintenance immunosuppression early after renal transplantation                                                                            | <a href="https://doi.org/10.1111/tri.13322">https://doi.org/10.1111/tri.13322</a><br><a href="https://doi.org/10.1111/ajt.14048">https://doi.org/10.1111/ajt.14048</a>                                                                                                                                                                                                                                                                                                                                                                                                                                                                       |
| MEDICLAS          | Metabolic Effects of Different Classes of Antiretrovirals Study                                                                                            | <a href="https://doi.org/10.1086/597475">https://doi.org/10.1086/597475</a><br><a href="https://doi.org/10.1097/QAD.0b013e32832c4947">https://doi.org/10.1097/QAD.0b013e32832c4947</a>                                                                                                                                                                                                                                                                                                                                                                                                                                                       |
| METEOR            | Measuring Effects on Intima-Media Thickness: an Evaluation of Rosuvastatin                                                                                 | <a href="https://doi.org/10.1001/jama.297.12.1344">https://doi.org/10.1001/jama.297.12.1344</a>                                                                                                                                                                                                                                                                                                                                                                                                                                                                                                                                              |
| MG600             | Effects of Magnesium Supplementation on Vascular Structure and Function in Hypertensive Patients Study                                                     | <a href="https://doi.org/10.1097/HJH.0000000000001129">https://doi.org/10.1097/HJH.0000000000001129</a>                                                                                                                                                                                                                                                                                                                                                                                                                                                                                                                                      |
| MIDAS             | Multicenter Isradipine Diuretic Atherosclerosis Study                                                                                                      | <a href="https://doi.org/10.1001/jama.1996.03540100029024">https://doi.org/10.1001/jama.1996.03540100029024</a>                                                                                                                                                                                                                                                                                                                                                                                                                                                                                                                              |
| MITEC             | Media Intima Thickness Evaluation with Candesartan Cilxetil Study                                                                                          | <a href="https://doi.org/10.1177/14746514070070010401">https://doi.org/10.1177/14746514070070010401</a><br><a href="https://doi.org/10.2147/VHRM.S3409">https://doi.org/10.2147/VHRM.S3409</a>                                                                                                                                                                                                                                                                                                                                                                                                                                               |
| Makimura et al.   | Makimura et al.                                                                                                                                            | <a href="https://doi.org/10.1210/jc.2012-2794">https://doi.org/10.1210/jc.2012-2794</a>                                                                                                                                                                                                                                                                                                                                                                                                                                                                                                                                                      |
| Masia et al.      | Masia et al.                                                                                                                                               | <a href="https://doi.org/10.1093/jac/dkp250">https://doi.org/10.1093/jac/dkp250</a>                                                                                                                                                                                                                                                                                                                                                                                                                                                                                                                                                          |
| Mitsuhashi et al. | Mitsuhashi et al.                                                                                                                                          | <a href="https://doi.org/10.1507/endoerj.51.545">https://doi.org/10.1507/endoerj.51.545</a>                                                                                                                                                                                                                                                                                                                                                                                                                                                                                                                                                  |

|                        |                                                                                                                                                                             |                                                                                                                                                                                                                                                                                                                                                                                                                                                              |
|------------------------|-----------------------------------------------------------------------------------------------------------------------------------------------------------------------------|--------------------------------------------------------------------------------------------------------------------------------------------------------------------------------------------------------------------------------------------------------------------------------------------------------------------------------------------------------------------------------------------------------------------------------------------------------------|
| Mortazavi et al.       | Mortazavi et al.                                                                                                                                                            | <a href="https://doi.org/10.1159/000346427">https://doi.org/10.1159/000346427</a>                                                                                                                                                                                                                                                                                                                                                                            |
| NTPP                   | NTPP                                                                                                                                                                        | <a href="https://doi.org/10.5551/jat.22095">https://doi.org/10.5551/jat.22095</a>                                                                                                                                                                                                                                                                                                                                                                            |
| Nakamura et al. II     | Nakamura et al. II                                                                                                                                                          | <a href="https://doi.org/10.1159/000077536">https://doi.org/10.1159/000077536</a>                                                                                                                                                                                                                                                                                                                                                                            |
| Ntaios et al.          | Ntaios et al.                                                                                                                                                               | <a href="https://doi.org/10.1016/j.ijcard.2009.01.023">https://doi.org/10.1016/j.ijcard.2009.01.023</a>                                                                                                                                                                                                                                                                                                                                                      |
| OPAL                   | Osteoporosis Prevention and Arterial Effects of Tibolone Study                                                                                                              | <a href="https://doi.org/10.1016/S0197-2456(03)00096-5">https://doi.org/10.1016/S0197-2456(03)00096-5</a><br><a href="https://doi.org/10.1093/eurheartj/ehi695">https://doi.org/10.1093/eurheartj/ehi695</a>                                                                                                                                                                                                                                                 |
| PART-2                 | Prevention of Atherosclerosis with Ramipril Trial                                                                                                                           | <a href="https://doi.org/10.1016/S0735-1097(00)00736-1">https://doi.org/10.1016/S0735-1097(00)00736-1</a>                                                                                                                                                                                                                                                                                                                                                    |
| PEACE                  | Pitavastatin Evaluation of Atherosclerosis Regression by Intensive Cholesterol-lowering Therapy Study                                                                       | <a href="https://doi.org/10.1177/2047487312451539">https://doi.org/10.1177/2047487312451539</a>                                                                                                                                                                                                                                                                                                                                                              |
| PERFORM                | Prevention of Cerebrovascular and Cardiovascular Events of Ischemic Origin with Terutroban in Patients with a History of Ischemic Stroke or Transient Ischemic Attack Trial | <a href="https://doi.org/10.1016/S0140-6736(11)60600-4">https://doi.org/10.1016/S0140-6736(11)60600-4</a><br><a href="https://doi.org/10.1161/STROKEAHA.114.004775">https://doi.org/10.1161/STROKEAHA.114.004775</a>                                                                                                                                                                                                                                         |
| PERIOCARDIO            | PerioCardio Study                                                                                                                                                           | <a href="https://doi.org/10.1161/HYPERTENSIONAHA.114.03359">https://doi.org/10.1161/HYPERTENSIONAHA.114.03359</a>                                                                                                                                                                                                                                                                                                                                            |
| PHOREA                 | Postmenopausal Hormone Replacement against Atherosclerosis Trial                                                                                                            | <a href="https://doi.org/10.1016/S0735-1097(00)00969-4">https://doi.org/10.1016/S0735-1097(00)00969-4</a>                                                                                                                                                                                                                                                                                                                                                    |
| PHYLLIS                | Plaque Hypertension Lipid-lowering Italian Study                                                                                                                            | <a href="https://doi.org/10.1097/00004872-200101000-00011">https://doi.org/10.1097/00004872-200101000-00011</a><br><a href="https://doi.org/10.1161/01.STR.0000147041.00840.59">https://doi.org/10.1161/01.STR.0000147041.00840.59</a>                                                                                                                                                                                                                       |
| PLAC II                | Pravastatin, Lipids, and Atherosclerosis in the Carotid Arteries Trial                                                                                                      | <a href="https://doi.org/10.1016/0002-9149(94)90297-6">https://doi.org/10.1016/0002-9149(94)90297-6</a><br><a href="https://doi.org/10.1016/S0002-9149(99)80580-3">https://doi.org/10.1016/S0002-9149(99)80580-3</a><br><a href="https://doi.org/10.1016/S0002-9149(99)80471-8">https://doi.org/10.1016/S0002-9149(99)80471-8</a>                                                                                                                            |
| PPAR                   | Peroxisome Proliferator-activated Receptor Study                                                                                                                            | <a href="https://doi.org/10.1016/j.ahj.2007.03.029">https://doi.org/10.1016/j.ahj.2007.03.029</a>                                                                                                                                                                                                                                                                                                                                                            |
| PREDIMED               | Prevención con Dieta Mediterránea Trial                                                                                                                                     | <a href="https://doi.org/10.1056/NEJMoa1200303">https://doi.org/10.1056/NEJMoa1200303</a><br><a href="https://doi.org/10.1161/ATVBAHA.113.302327">https://doi.org/10.1161/ATVBAHA.113.302327</a>                                                                                                                                                                                                                                                             |
| PREVEND IT             | Prevention of Renal and Vascular Endstage Disease Intervention Trial                                                                                                        | <a href="https://doi.org/10.1016/S0002-9149(00)01042-0">https://doi.org/10.1016/S0002-9149(00)01042-0</a><br><a href="https://doi.org/10.1161/01.CIR.0000146378.65439.7A">https://doi.org/10.1161/01.CIR.0000146378.65439.7A</a><br><a href="https://doi.org/10.1161/01.STR.0000155731.92786.e9">https://doi.org/10.1161/01.STR.0000155731.92786.e9</a><br><a href="https://doi.org/10.1016/j.ahj.2011.03.028">https://doi.org/10.1016/j.ahj.2011.03.028</a> |
| PREVENT                | Prospective Randomized Evaluation of the Vascular Effects of Norvasc Trial                                                                                                  | <a href="https://doi.org/10.1016/s0002-9149(97)00611-5">https://doi.org/10.1016/s0002-9149(97)00611-5</a><br><a href="https://doi.org/10.1161/01.cir.102.13.1503">https://doi.org/10.1161/01.cir.102.13.1503</a>                                                                                                                                                                                                                                             |
| PROBE                  | Pioglitazone Anti-atherosclerosis Effect on Prospective Randomized Open Blinded Endpoint Trial                                                                              | <a href="https://doi.org/10.1185/03007990903328124">https://doi.org/10.1185/03007990903328124</a><br><a href="https://doi.org/10.5551/jat.4663">https://doi.org/10.5551/jat.4663</a>                                                                                                                                                                                                                                                                         |
| RADIANCE I             | Rating Atherosclerosis Disease Change by Imaging with a New CETP Inhibitor 1 Study                                                                                          | <a href="https://doi.org/10.1056/NEJMoa071359">https://doi.org/10.1056/NEJMoa071359</a><br><a href="https://doi.org/10.1185/030079907X182121">https://doi.org/10.1185/030079907X182121</a>                                                                                                                                                                                                                                                                   |
| RADIANCE II            | Rating Atherosclerosis Disease Change by Imaging with a New CETP Inhibitor 2 Study                                                                                          | <a href="https://doi.org/10.1185/030079907X182121">https://doi.org/10.1185/030079907X182121</a><br><a href="https://doi.org/10.1016/S0140-6736(07)61088-5">https://doi.org/10.1016/S0140-6736(07)61088-5</a>                                                                                                                                                                                                                                                 |
| RAS                    | Rosiglitazone Atherosclerosis Study                                                                                                                                         | <a href="https://doi.org/10.1111/j.1365-2796.2007.01767.x">https://doi.org/10.1111/j.1365-2796.2007.01767.x</a>                                                                                                                                                                                                                                                                                                                                              |
| REGRESS                | Regression Growth Evaluation Statin Study                                                                                                                                   | <a href="https://doi.org/10.1016/S0002-9149(99)80469-X">https://doi.org/10.1016/S0002-9149(99)80469-X</a><br><a href="https://doi.org/10.1016/S0735-1097(98)00170-3">https://doi.org/10.1016/S0735-1097(98)00170-3</a>                                                                                                                                                                                                                                       |
| REMOVAL                | Reducing with Metformin Vascular Adverse Lesions                                                                                                                            | <a href="https://doi.org/10.1111/dom.12840">https://doi.org/10.1111/dom.12840</a><br><a href="https://doi.org/10.1016/S2213-8587(17)30194-8">https://doi.org/10.1016/S2213-8587(17)30194-8</a>                                                                                                                                                                                                                                                               |
| RIS                    | Risk Factor Intervention Study                                                                                                                                              | <a href="https://doi.org/10.1046/j.1365-2796.2001.00818.x">https://doi.org/10.1046/j.1365-2796.2001.00818.x</a>                                                                                                                                                                                                                                                                                                                                              |
| SANDS                  | Stop Atherosclerosis in Native Diabetics Study                                                                                                                              | <a href="https://doi.org/10.1001/jama.299.14.1678">https://doi.org/10.1001/jama.299.14.1678</a><br><a href="https://doi.org/10.1016/j.jacc.2008.10.031">https://doi.org/10.1016/j.jacc.2008.10.031</a><br><a href="https://doi.org/10.1111/j.1751-7176.2009.00121.x">https://doi.org/10.1111/j.1751-7176.2009.00121.x</a>                                                                                                                                    |
| SCIMO                  | Study on Prevention of Coronary Atherosclerosis by Intervention with Marine Omega-3 Fatty Acids                                                                             | <a href="https://doi.org/10.1016/S0008-6363(02)00229-8">https://doi.org/10.1016/S0008-6363(02)00229-8</a><br><a href="https://doi.org/10.7326/0003-4819-130-7-199904060-00003">https://doi.org/10.7326/0003-4819-130-7-199904060-00003</a>                                                                                                                                                                                                                   |
| SECURE                 | Study to Evaluate Carotid Ultrasound Changes in Patients Treated with Ramipril and Vitamin E                                                                                | <a href="https://doi.org/10.1161/01.CIR.103.7.919">https://doi.org/10.1161/01.CIR.103.7.919</a>                                                                                                                                                                                                                                                                                                                                                              |
| SEKONA                 | Sekundärprävention bei Patienten mit Koronarer Herzkrankheit durch Anschlussheilbehandlung und anschließender konzeptintegrierter Nachsorge                                 | <a href="https://doi.org/10.1177/2047487312465526">https://doi.org/10.1177/2047487312465526</a>                                                                                                                                                                                                                                                                                                                                                              |
| SENDCAP                | St. Mary's, Ealing, Northwick Park Diabetes Cardiovascular Disease Prevention                                                                                               | <a href="https://doi.org/10.2337/diacare.21.4.641">https://doi.org/10.2337/diacare.21.4.641</a>                                                                                                                                                                                                                                                                                                                                                              |
| SPEAD-A                | Study of Preventive Effects of Alogliptin on Diabetic Atherosclerosis                                                                                                       | <a href="https://doi.org/10.5551/jat.18333">https://doi.org/10.5551/jat.18333</a><br><a href="https://doi.org/10.2337/dc15-0781">https://doi.org/10.2337/dc15-0781</a>                                                                                                                                                                                                                                                                                       |
| SPIKE                  | Sitagliptin Preventive Study of Intima-Media Thickness Evaluation                                                                                                           | <a href="https://doi.org/10.2337/dc15-2145">https://doi.org/10.2337/dc15-2145</a><br><a href="https://doi.org/10.1111/jdi.12559">https://doi.org/10.1111/jdi.12559</a><br><a href="https://doi.org/10.1186/s12933-018-0666-3">https://doi.org/10.1186/s12933-018-0666-3</a>                                                                                                                                                                                  |
| STARR                  | Study of Atherosclerosis with Ramipril and Rosiglitazone                                                                                                                    | <a href="https://doi.org/10.1016/j.jacc.2008.12.072">https://doi.org/10.1016/j.jacc.2008.12.072</a>                                                                                                                                                                                                                                                                                                                                                          |
| STOP-NIDDM             | Study to Prevent Non-Insulin-Dependent Diabetes Mellitus - Dresden Cohort                                                                                                   | <a href="https://doi.org/10.1001/jama.290.4.486">https://doi.org/10.1001/jama.290.4.486</a><br><a href="https://doi.org/10.1161/01.STR.0000125864.01546.f2">https://doi.org/10.1161/01.STR.0000125864.01546.f2</a>                                                                                                                                                                                                                                           |
| Safarova et al.        | Safarova et al.                                                                                                                                                             | <a href="https://pubmed.ncbi.nlm.nih.gov/21649590">https://pubmed.ncbi.nlm.nih.gov/21649590</a>                                                                                                                                                                                                                                                                                                                                                              |
| Sander et al. (Cp neg) | Sander et al. (Chlamydia pneumoniae negative)                                                                                                                               | <a href="https://doi.org/10.1161/01.CIR.103.10.1390">https://doi.org/10.1161/01.CIR.103.10.1390</a><br><a href="https://doi.org/10.1161/01.CIR.0000036748.26775.8D">https://doi.org/10.1161/01.CIR.0000036748.26775.8D</a>                                                                                                                                                                                                                                   |
| Sander et al. (Cp pos) | Sander et al. (Chlamydia pneumoniae positive)                                                                                                                               | <a href="https://doi.org/10.1161/01.CIR.103.10.1390">https://doi.org/10.1161/01.CIR.103.10.1390</a><br><a href="https://doi.org/10.1161/01.CIR.0000036748.26775.8D">https://doi.org/10.1161/01.CIR.0000036748.26775.8D</a>                                                                                                                                                                                                                                   |

|                |                                                                    |                                                                                                                                                                                                                                    |
|----------------|--------------------------------------------------------------------|------------------------------------------------------------------------------------------------------------------------------------------------------------------------------------------------------------------------------------|
| Spring et al.  | Spring et al.                                                      | <a href="https://doi.org/10.1160/TH07-04-0265">https://doi.org/10.1160/TH07-04-0265</a>                                                                                                                                            |
| Stanley et al. | Stanley et al.                                                     | <a href="https://doi.org/10.1001/jama.2014.8334">https://doi.org/10.1001/jama.2014.8334</a>                                                                                                                                        |
| Stanton et al. | Stanton et al.                                                     | <a href="https://doi.org/10.1042/cs1010455">https://doi.org/10.1042/cs1010455</a>                                                                                                                                                  |
| TART           | Troglitazone Atherosclerosis Regression Trial                      | <a href="https://doi.org/10.2337/dc05-2462">https://doi.org/10.2337/dc05-2462</a>                                                                                                                                                  |
| TEAAM          | Testosterone's Effects on Atherosclerosis Progression in Aging Men | <a href="https://doi.org/10.1001/jama.2015.8881">https://doi.org/10.1001/jama.2015.8881</a>                                                                                                                                        |
| TRIPOD         | Troglitazone in Prevention of Diabetes Study                       | <a href="https://doi.org/10.1210/jc.2004-1685">https://doi.org/10.1210/jc.2004-1685</a>                                                                                                                                            |
| Tasic et al.   | Tasic et al.                                                       | <a href="https://doi.org/10.2298/SARH0604106T">https://doi.org/10.2298/SARH0604106T</a>                                                                                                                                            |
| VEAPS          | Vitamin E Atherosclerosis Prevention Study                         | <a href="https://doi.org/10.1161/01.CIR.0000029092.99946.08">https://doi.org/10.1161/01.CIR.0000029092.99946.08</a>                                                                                                                |
| VHAS           | Verapamil in Hypertension and Atherosclerosis Study                | <a href="https://doi.org/10.1097/00004872-199715110-00019">https://doi.org/10.1097/00004872-199715110-00019</a><br><a href="https://doi.org/10.1097/00004872-199816110-00014">https://doi.org/10.1097/00004872-199816110-00014</a> |
| VIP            | Vascular Imaging Project                                           | <a href="https://doi.org/10.1097/TP.0b013e3182958552">https://doi.org/10.1097/TP.0b013e3182958552</a>                                                                                                                              |
| VITAL          | Vital Study                                                        | <a href="https://doi.org/10.1016/j.amjcard.2012.04.045">https://doi.org/10.1016/j.amjcard.2012.04.045</a>                                                                                                                          |
| WISH           | Women's Isoflavone Soy Health Trial                                | <a href="https://doi.org/10.1161/STROKEAHA.111.620831">https://doi.org/10.1161/STROKEAHA.111.620831</a>                                                                                                                            |
| Yang et al.    | Yang et al.                                                        | <a href="https://doi.org/10.1016/j.clinthera.2018.08.014">https://doi.org/10.1016/j.clinthera.2018.08.014</a>                                                                                                                      |
| Yun et al.     | Yun et al.                                                         | <a href="https://doi.org/10.1155/2016/1602083">https://doi.org/10.1155/2016/1602083</a>                                                                                                                                            |
| Zou et al.     | Zou et al.                                                         | <a href="https://doi.org/10.1017/S0007114513002730">https://doi.org/10.1017/S0007114513002730</a>                                                                                                                                  |

# Supplemental Figures

Supplemental Figure I. PRISMA Flow chart

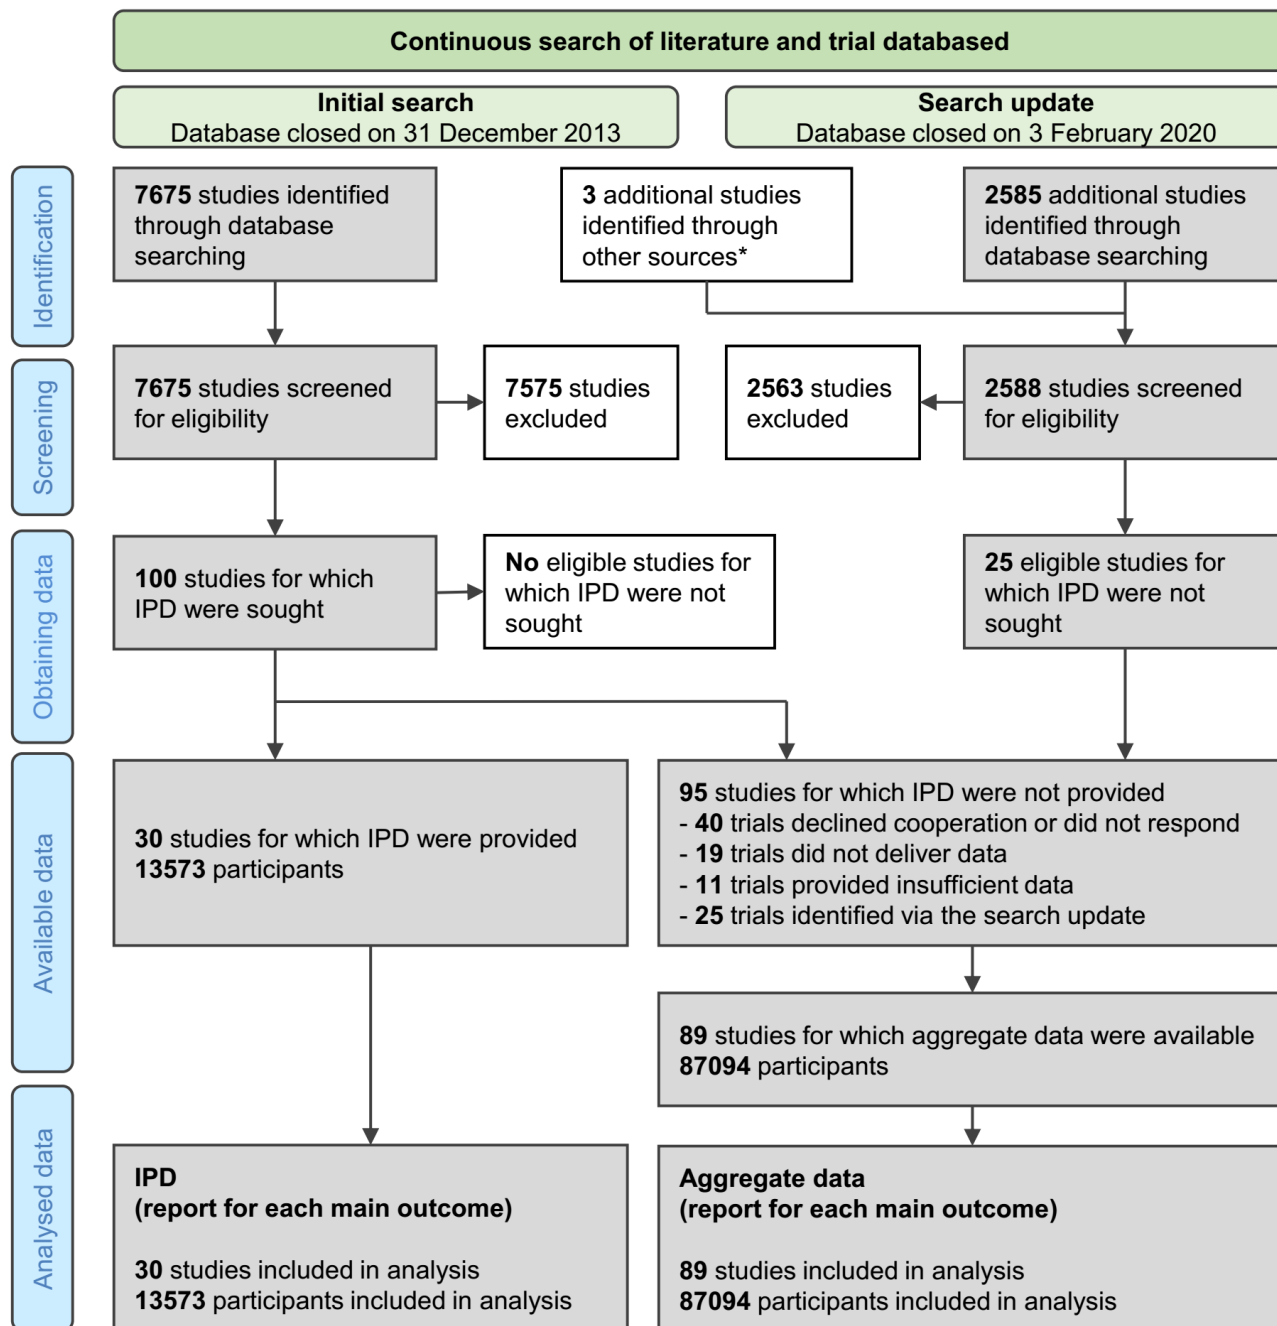

The PRISMA IPD flow diagram

© Reproduced with permission of the PRISMA IPD Group, which encourages sharing and reuse for non commercial purposes

\*identified through screening of reference lists and review articles

**Supplemental Figure II. Leave-one out cross-validation analysis showing 95% prediction intervals for each study**

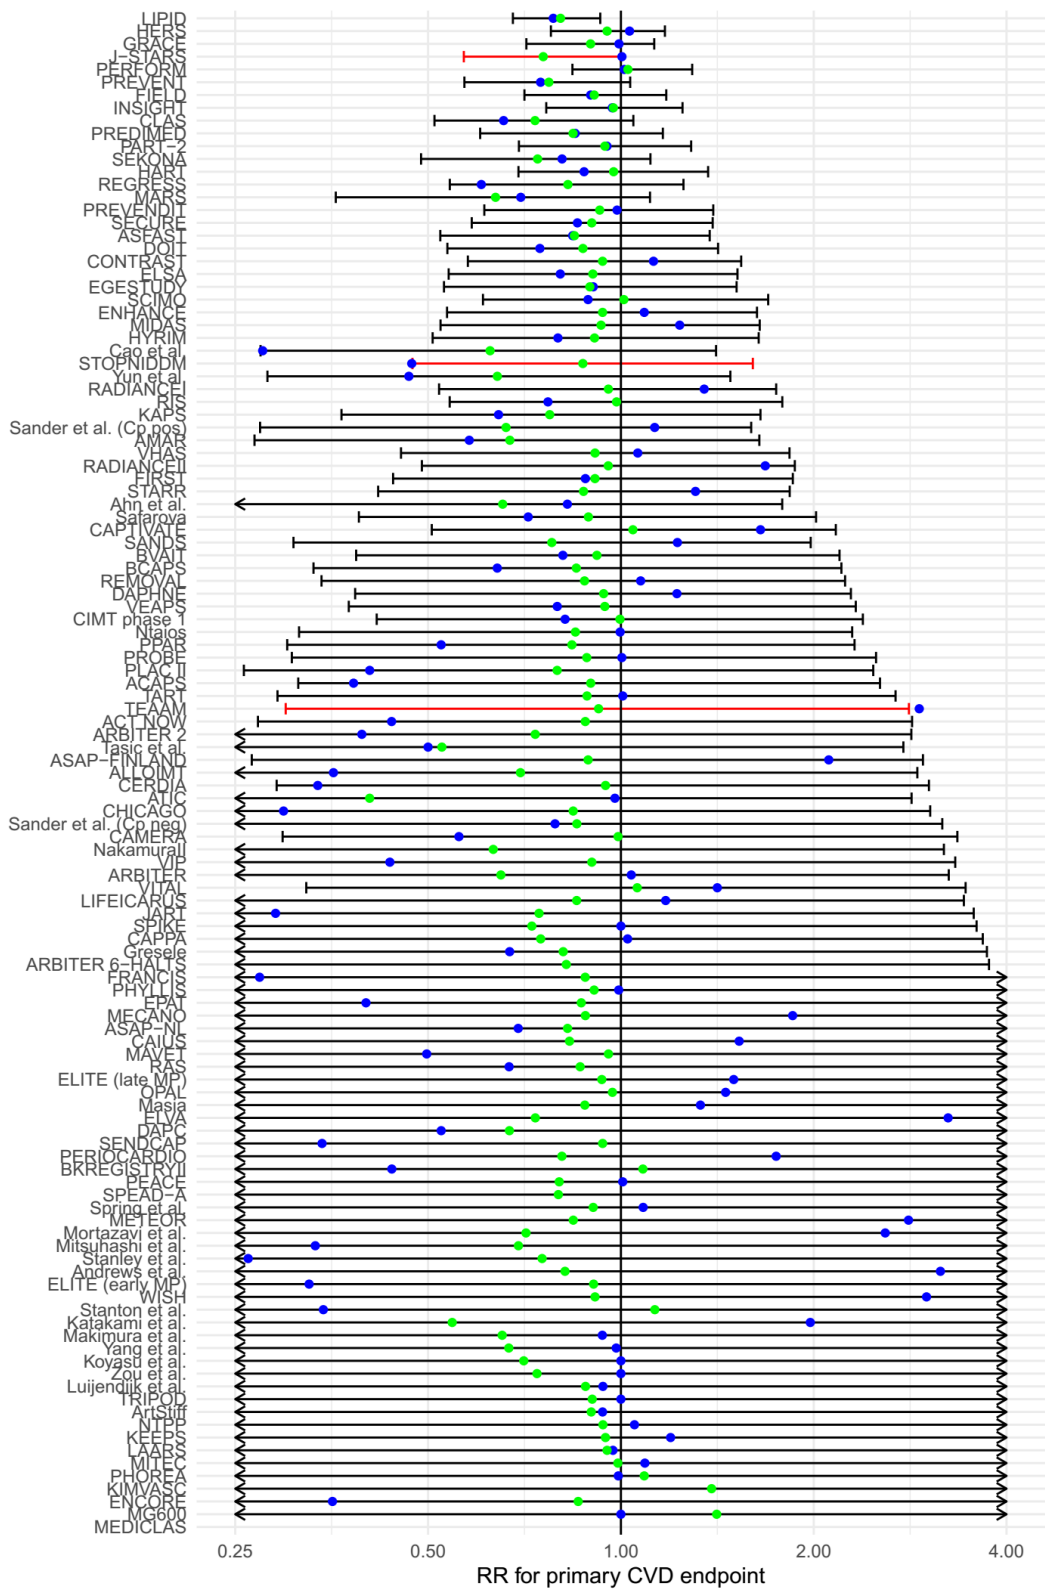

Green circles denote predicted RRs, blue circles are the observed RRs. Lines are coloured red for prediction intervals in which the observed RR is outside the interval. Abbreviations: RR=relative risk. **Table V in the Supplement** provides full names of the contributing trials.

## Full list of the PROG-IMT and the Proof-ATHERO study groups and their affiliations

Stefan Agewall, MD, PhD  
Oslo University Hospital  
Ullevål and Institute of Clinical  
Sciences  
University of Oslo  
Oslo, Norway

Tadao Akizawa, MD, PhD  
Division of Nephrology,  
Department of Medicine  
Showa University School of  
Medicine  
Tokyo, Japan

Elias Allara, MD  
Department of Public Health  
and Primary Care  
University of Cambridge  
Cambridge, UK  
and  
National Institute for Health  
Research Blood and Transplant  
Research Unit in Donor Health  
and Genomics  
University of Cambridge  
Cambridge, UK

Mayuko Amaha, MD  
Division of Nephrology  
Shinmatsudo Central General  
Hospital  
Chiba, Japan

Mauro Amato, PhD  
Centro Cardiologico Monzino  
IRCCS  
Milan, Italy

Steen Andersen, MD, DMSc  
Steno Diabetes Center  
Gentofte, Denmark

Sigmund A. Anderssen, PhD  
Department of Sports Medicine  
Norwegian School of Sports  
Sciences  
Oslo, Norway

Aleksandra Araszkiwicz, MD,  
PhD  
Department of Internal  
Medicine and Diabetology  
Poznan University of Medical  
Sciences  
Poznan, Poland

Gülay Aşçi, MD  
Nephrology Department  
Ege University School of  
Medicine  
Bornova-Izmir, Turkey

Folkert W. Asselbergs, MD,  
PhD  
Department of Cardiology  
University Medical Center  
Utrecht  
Utrecht, the Netherlands

Jang-Ho Bae, MD, FACC  
Heart Center  
Konyang University Hospital  
Daejeon, South Korea  
and  
Department of Cardiology  
Konyang University College of  
Medicine  
Daejeon, South Korea

Tatyana Balakhonova, MD,  
PhD  
Ultrasound Vascular  
Laboratory  
National Medical Research  
Center of Cardiology  
Moscow, Russia

Damiano Baldassarre, PhD  
Department of Medical  
Biotechnology and  
Translational Medicine  
University of Milan  
Milan, Italy  
and  
Centro Cardiologico Monzino  
IRCCS  
Milan, Italy

John A. Bartlett, MD  
Division of Infectious Diseases  
and International Health,  
Department of Medicine  
Duke University Medical  
Center  
Durham, North Carolina, USA  
and  
Duke Global Health Institute  
Durham, North Carolina, USA

Edith Beishuizen, MD  
Department of Internal  
Medicine  
HMC+ (Bronovo)  
the Hague, the Netherlands

Oscar Beloqui, MD, PhD  
Department of Internal  
Medicine  
University Clinic of Navarra  
Navarra, Spain

Gerald Berenson, MD  
Department of Medicine,  
Pediatrics, Biochemistry,  
Epidemiology  
Tulane University School of  
Medicine and School of Public  
Health and Tropical Medicine  
New Orleans, USA

Göran Bergström, MD, PhD  
Department of Molecular and  
Clinical Medicine, Institute of  
Medicine, Sahlgrenska  
Academy  
University of Gothenburg  
Gothenburg, Sweden  
and  
Department of Clinical  
Physiology  
Sahlgrenska University  
Hospital, Region Västra  
Götaland  
Gothenburg, Sweden

Enrique Bernal, MD, PhD  
Infectious Diseases Unit  
Reina Sofia Hospital  
Murcia, Spain

Joline W. J. Beulens, PhD  
Department of Epidemiology &  
Biostatistics  
Amsterdam UMC- Location  
Vumc  
Amsterdam, the Netherlands



Sebastjan Bevc, MD, PhD  
Department of Nephrology  
University Medical Centre  
Maribor  
Maribor, Slovenia  
and  
Faculty of Medicine  
University of Maribor  
Maribor, Slovenia

Lokpal Bhatia, MD, MRCP,  
PhD  
Faculty of Medicine  
University of Southampton -  
Southampton General Hospital  
Southampton, UK  
and  
Southampton NIHR  
Biomedical Research Centre  
University Hospital  
Southampton - Southampton  
General Hospital  
Southampton, UK

Horst Bickel, PhD  
Department of Psychiatry and  
Psychotherapy  
Technische Universität  
München  
Munich, Germany

Stefan Blankenberg, MD  
Department of Cardiology  
University Hospital Hamburg-  
Eppendorf  
Hamburg, Germany  
and  
2nd Department of Medicine  
Johannes Gutenberg-  
Universität  
Mainz, Germany

Peter J. Blankestijn, MD  
Department of Nephrology  
University Medical Center  
Utrecht  
Utrecht, the Netherlands

James A. Blumenthal, PhD  
Department of Psychiatry and  
Behavioral Sciences  
Duke University Medical  
Center  
Durham, NC 27710, USA

Lena Bokemark, MD, PhD  
Wallenberg Laboratory for  
Cardiovascular Research  
University of Gothenburg  
Gothenburg, Sweden

Michiel L. Bots, MD, PhD  
Julius Center for Health  
Sciences and Primary Care  
University Medical Center  
Utrecht  
Utrecht, the Netherlands

Frank P. Brouwers, MD, PhD  
Department of Cardiology  
Haga Teaching Hospital  
the Hague, the Netherlands

Christopher D. Byrne, FRCP,  
FRCPath, PhD  
Human Development and  
Health Academic Unit, Faculty  
of Medicine, The Institute of  
Developmental Sciences  
University of Southampton -  
Southampton General Hospital  
Southampton, UK

Laura Calabresi, PhD  
Department of  
Pharmacological and  
Biomolecular Sciences  
University of Milan  
Milan, Italy

Philip C. Calder, PhD  
Faculty of Medicine  
University of Southampton -  
Southampton General Hospital  
Southampton, UK  
and  
Southampton NIHR  
Biomedical Research Centre  
University Hospital  
Southampton - Southampton  
General Hospital  
Southampton, UK

Yong-Jun Cao, MD, PhD  
Department of Neurology  
Second Affiliated Hospital of  
Soochow University  
Suzhou, China

Samuela Castelnovo, PhD  
Centro Dislipidemie  
ASST Grande Ospedale  
Metropolitano Niguarda  
Milan, Italy

Alberico Catapano, PhD  
Department of  
Pharmacological and  
Biomolecular Sciences  
University of Milan  
Milan, Italy  
and  
IRCCS Multimedica  
Milan, Italy

Chen-Huan Chen, MD  
Faculty of Medicine  
National Yang-Ming  
University  
Taipei, Taiwan

Pei-Chun Chen, PhD  
Clinical Informatics & Medical  
Statistics Research Center  
Chang Gung University  
Taoyuan, Taiwan

Kuo-Liong Chien, MD, PhD  
Institute of Epidemiology and  
Preventive Medicine  
National Taiwan University  
Taipei, Taiwan

Ana R. Cunha, PhD  
Department of Clinical  
Medicine  
State University of Rio de  
Janeiro  
Rio de Janeiro, Brazil

Francois Dabis, MD, PhD  
Centre de Recherche INSERM  
U.897  
Université Victor Segalen  
Bordeaux 2  
Bordeaux Cedex, France

Jesse Dawson, MD, FRCP,  
FESO  
Institute of Cardiovascular and  
Medical Sciences  
University of Glasgow  
Glasgow, UK

Eric de Groot, MD, PhD  
Imagelabonline &  
Cardiovascular  
Eindhoven and Lunteren, the  
Netherlands

Ralph A. DeFronzo, MD  
Diabetes Division  
University of Texas Health  
Science Center  
San Antonio, USA

Moise Desvarieux, MD, PhD  
Department of Epidemiology  
Mailman School of Public  
Health, Columbia University  
New York, USA  
and  
METHODS Core, Centre de  
Recherche Epidémiologie et  
Statistique Paris Sorbonne Cité  
(CRESS)  
Institut National de la Santé et  
de la Recherche Médicale  
(INSERM) UMR 1153  
Paris, France

Chrysostomos Dimitriadis, MD  
University Department of  
Nephrology  
Hippokraton General Hospital  
Thessaloniki, Greece

Marcus Dörr, MD  
Department B for Internal  
Medicine  
University Medicine  
Greifswald  
Greifswald, Germany  
and  
German Center for  
Cardiovascular Research  
(DZHK)  
Greifswald, Germany

Pierre Ducimetiere, PhD  
Faculty of Medicine  
University Paris Descartes  
Paris, France

Helen Eddington, MD  
Institute of Applied Health  
Research  
University Hospitals  
Birmingham  
Birmingham, UK

Robert Ekart, MD, PhD  
Department of Dialysis  
University Medical Centre  
Maribor  
Maribor, Slovenia

Petra Elders, MD, PhD  
Department of General Practice  
Amsterdam UMC- Location  
Vumc  
Amsterdam, the Netherlands

Jean Philippe Empana, MD,  
PhD  
Paris Cardiovascular Research  
Centre (PARCC)  
University Paris Descartes  
Paris, France

Gunnar Engström, MD, PhD  
Department of Clinical  
Sciences in Malmö  
Lund University  
Malmö, Sweden

Mark A. Espeland, PhD  
Department of Biostatistical  
Sciences  
Wake Forest School of  
Medicine  
Winston-Salem, NC, USA

Christine Espinola-Klein, MD  
2nd Department of Medicine  
Johannes-Gutenberg University  
Mainz, Germany

Ramon Estruch, MD, PhD  
Endocrinology & Nutrition  
Service  
Hospital Clínic de Barcelona  
Barcelona, Spain

Marat Ezhov, MD, PhD  
Laboratory of Lipid Disorders  
National Medical Research  
Center of Cardiology  
Moscow, Russia

Beat Frauchiger, MD  
Department of Internal  
Medicine  
Kantonsspital Frauenfeld  
Frauenfeld, Switzerland

Alfonsa Frieria, MD  
Radiology Department  
Universidad Autónoma de  
Madrid  
Madrid, Spain

Rafael Gabriel, MD, PhD  
National School of Public  
Health  
Instituto de Salud Carlos III  
Madrid, Spain

Greg Gamble, MSc  
Department of Medicine  
The University of Auckland  
Auckland, New Zealand

Lu Gao, BSc, MSc  
MRC Biostatistics Unit  
University of Cambridge  
Cambridge, UK

Hertzel C. Gerstein, MD, MSc,  
FRCPC  
Department of Medicine and  
Population Health Research  
Institute  
McMaster University  
Hamilton, Ontario, Canada  
and  
Hamilton General Hospital  
Hamilton, Ontario, Canada

Paolo Gresele, MD, PhD  
Division of Internal and  
Cardiovascular Medicine,  
Department of Medicine  
University of Perugia  
Perugia, Italy

Liliana Grigore, MD, PhD  
SISA Center for the Study of  
Atherosclerosis  
Bassini Hospital  
Cinisello Balsamo, Italy

Diederick E. Grobbee, MD,  
PhD  
Julius Center for Health  
Sciences and Primary Care  
University Medical Center  
Utrecht  
Utrecht, the Netherlands

Muriel P. C. Grooteman, MD,  
PhD  
Department of Nephrology  
Amsterdam UMC  
Amsterdam, the Netherlands

Giuseppe Guglielmini, PhD  
Division of Internal and  
Cardiovascular Medicine,  
Department of Medicine  
University of Perugia  
Perugia, Italy

Markolf Hanefeld, MD, DHC,  
PhD  
Center for Clinical Studies  
Technical University Dresden  
Dresden, Germany

Apostolos I. Hatzitolios, MD, PhD, FESH  
1st Propedeutic Department of Internal Medicine  
Aristotle University of Thessaloniki  
Thessaloniki, Greece

Bo Hedblad, MD, PhD  
Department of Clinical Sciences in Malmö  
Lund University  
Malmö, Sweden

Frans A. Helmond, PhD  
Merck Research Laboratories  
Kenilworth, NJ, USA

Loghman Henareh, MD, PhD  
Department of Medicine,  
Huddinge (MedH), H7  
Stockholm, Sweden

Peter Higgins, MD, MRCP  
Institute of Cardiovascular and Medical Sciences  
University of Glasgow  
Glasgow, UK

Alan Hinderliter, MD  
Department of Medicine  
University of North Carolina  
Chapel Hill, NC, USA

Radovan Hojs, MD, PhD  
Department of Nephrology  
University Medical Centre  
Maribor  
Maribor, Slovenia  
and  
Faculty of Medicine  
University of Maribor  
Maribor, Slovenia

Hirokazu Honda, MD, PhD  
Division of Nephrology,  
Department of Medicine,  
Showa University School of Medicine  
Tokyo, Japan

Satoshi Hoshida, MD, PhD  
Department of Medicine  
Jichi Medical University  
School of Medicine  
Tochigi, Japan

Menno V. Huisman, MD, PhD  
Department of Thrombosis and Hemostasis  
Leiden University Medical Center  
Leiden, the Netherlands

Joseph Hung, MBBS, FRACP, FACC  
School of Medicine and Pharmacology  
University of Western Australia  
Nedlands, Australia  
and  
Department of Cardiovascular Medicine  
Sir Charles Gairdner Hospital  
Nedlands, Australia

Bernhard Iglseder, MD  
Department of Geriatric Medicine  
Gemeinnützige Salzburger Landeskliniken  
Betriebsgesellschaft GmbH  
Christian-Doppler-Klinik  
Salzburg, Austria  
and

Department of Geriatric Medicine  
Paracelsus Medical University  
Salzburg, Austria

M. Arfan Ikram, MD, PhD  
Department of Epidemiology  
Erasmus University Medical Center  
Rotterdam, the Netherlands

Raffaele Izzo, MD, PhD  
Department of Advanced Biochemical Sciences  
Federico II University  
Naples, Italy

Lisa M. Jamieson, PhD  
Australian Research Centre for Population Oral Health  
University of Adelaide  
Adelaide, SA, Australia

Tomas Jogestrand, MD, PhD  
Department of Laboratory Medicine (LABMED), H5,  
Division of clinical physiology  
Stockholm, Sweden

Stein Harald Johnsen, MD, PhD  
Department of Neurology  
University Hospital of Northern Norway  
Tromsø, Norway  
and  
Department of Clinical Medicine  
University of Tromsø  
Tromsø, Norway

Aleksandar Jovanovic, MD, PhD  
Faculty of Medicine  
University of Prishtina  
Prishtina/Kosovska Mitrovica,  
Serbia

Anna Kablak-Ziembicka, MD, PhD  
Department of Interventional Cardiology  
Collegium Medicum  
Jagiellonian University  
Krakow, Poland

Philip A. Kalra, MD, PhD  
Department of Renal Medicine  
Salford Royal Hospital  
Manchester, UK

Kostas Kapellas, PhD  
Australian Research Centre for Population Oral Health  
University of Adelaide  
Adelaide, SA, Australia

Kazuomi Kario, MD, PhD  
Department of Medicine  
Jichi Medical University  
School of Medicine  
Tochigi, Japan

John J. P. Kastelein, MD, PhD, FESC  
Department of Vascular Medicine  
Academic Medical Centre,  
University of Amsterdam  
Amsterdam, the Netherlands

Akihiko Kato, MD  
Blood Purification Unit  
Hamamatsu University  
Hospital  
Hamamatsu, Japan

Jussi Kauhanen, MD  
Institute of Public Health and  
Clinical Nutrition  
University of Eastern Finland,  
Kuopio Campus  
Kuopio, Finland

Maryam Kavousi, MD, PhD,  
FESC  
Department of Epidemiology  
Erasmus University Medical  
Center  
Rotterdam, the Netherlands

Masanori Kawasaki, MD, PhD  
Department of Cardiology  
Gifu University Graduate  
School of Medicine  
Gifu, Japan

Kerstin Kempf, PhD  
Düsseldorf Catholic Hospital  
Group (VKKD)  
Düsseldorf, Germany

Stefan Kiechl, MD  
Department of Neurology  
Medical University of  
Innsbruck  
Innsbruck, Austria  
and  
VASCage GmbH  
Research Centre on Vascular  
Ageing and Stroke  
Innsbruck, Austria

Jang-Young Kim, MD, PhD  
Department of Cardiology  
College of Medicine Yonsei  
University  
Wonju, South Korea

Kazuo Kitagawa, MD, PhD  
Department of Neurology  
Tokyo Women's Medical  
University  
Tokyo, Japan

Sverre E. Kjeldsen, MD, PhD  
Department of Cardiology  
Oslo University Hospital  
Oslo, Norway

Gerhard Klingenschmid, MD  
Department of Neurology  
Medical University of  
Innsbruck  
Innsbruck, Austria

Sang Back Koh, MD, PhD  
Preventive Medicine, College  
of Medicine  
Yonsei University  
Wonju, South Korea

Svetlana Kostic, MSc, MD  
Primarius Institute for Therapy  
and Rehabilitation  
Niš, Serbia

Manuel F. Landecho, MD, PhD  
Department of Internal  
Medicine  
University Clinic of Navarra  
Navarra, Spain

Tatjana Lazarevic, MA  
Faculty of Medicine  
University of Kragujevac  
Kragujevac, Serbia

Moo-Sik Lee, MD, PhD  
Department of Preventive  
Medicine  
Konyang University  
Daejeon, South Korea  
and  
College of Medicine  
Konyang University Hospital  
Daejeon, South Korea

Seung Hwan Lee, MD, PhD  
Department of Cardiology  
Yonsei University  
Wonju, South Korea

Wattana Leowattana, MD, PhD  
Department of Clinical  
Tropical Medicine  
Mahidol University  
Rachatawee, Bangkok,  
Thailand

Ximing Liao, BSc, MSc, PhD  
Department of Neurology  
Goethe University  
Frankfurt am Main, Germany

Yao-Ping Lin, MD, PhD  
Department of Medicine  
Taipei Veterans General  
Hospital  
Taipei, Taiwan

Hung-Ju Lin, MSc  
Department of Internal  
Medicine  
National Taiwan University  
Hospital  
Taipei, Taiwan

Lars Lind, MD, PhD  
Department of Medicine  
Uppsala University  
Uppsala, Sweden

Chun-Feng Liu, MD, PhD  
Department of Neurology  
Second Affiliated Hospital of  
Soochow University  
Suzhou, China

Jing Liu, MD, PhD  
Department of Epidemiology  
Beijing Anzhen Hospital,  
Capital Medical University  
Beijing, China

Eva Lonn, MD, MSc, FRCPC,  
FACC  
Department of Medicine and  
Population Health Research  
Institute  
McMaster University  
Hamilton, Ontario, Canada  
and  
Hamilton General Hospital  
Hamilton, Ontario, Canada

Larrye E. Loss, PharmD,  
MBA, PMP  
AstraZeneca  
Gaithersburg (Maryland), USA

Dianna Magliano, PhD  
Department of Epidemiology  
and Preventive Medicine  
Monash University, Alfred  
Hospital  
Melbourne, Australia

Francesca Mallamaci, MD  
Institute of Biomedicine (CNR)  
Centre of Clinical Physiology  
and Division of Nephrology  
Reggio Calabria, Italy

Costantino Mancusi, MD  
Department of Advanced  
Biochemical Sciences  
Federico II University  
Naples, Italy

Maria V. Manzi, MD  
Department of Advanced  
Biochemical Sciences  
Federico II University  
Naples, Italy

Stephan Martin, MD, PhD  
Düsseldorf Catholic Hospital  
Group (VKKD)  
Düsseldorf, Germany

Ellisiv B. Mathiesen, MD, PhD  
Department of Clinical  
Medicine  
University of Tromsø  
Tromsø, Norway

Wolfgang Mayer-Berger, MD  
Rehabilitationsklinik für Herz-,  
Kreislauf-, Gefäßkrankungen  
und Psychokardiologie  
Klinik Roderbirken  
Leichlingen, Germany

Barry P. McGrath, PhD, MBBS  
Department of Vascular  
Sciences  
Monash University,  
Dandenong Hospital  
Melbourne, Australia

Stela McLachlan, PhD  
Usher Institute  
University of Edinburgh  
Edinburgh, UK

John McNeil, PhD, MBBS  
School of Public Health and  
Preventive Medicine  
Monash University  
Melbourne, Australia

Brendan McQuillan, MBBS,  
PhD, FRACP  
School of Medicine and  
Pharmacology  
University of Western  
Australia  
Nedlands, Australia  
and  
Department of Cardiovascular  
Medicine  
Sir Charles Gairdner Hospital  
Nedlands, Australia

Patrick Mercié, MD  
Service de Médecine Interne  
CHU de Bordeaux  
Bordeaux, France

Rino Migliacci, MD, PhD  
Division of Internal Medicine  
Cortona Hospital  
Cortona, Italy

Dragan Mijalković, MD  
Institute for Treatment and  
Rehabilitation  
Niška Banja, Serbia

Firouzeh Moeinzadeh, MD  
Department of Internal  
Medicine  
Isfahan University of Medical  
Sciences  
Isfahan, Iran

Mojgan Mortazavi, MD  
Nephrology Department  
Isfahan University of medical  
sciences  
Isfahan, Iran

Titus Francis Msoka, MD, PhD  
Department of Internal  
Medicine  
Kilimanjaro Christian Medical  
Centre  
Moshi, Tanzania

Veronica A. Myasoedova, MD,  
PhD  
Unit for the Study of Aortic,  
Valvular, and Coronary  
Pathologies  
Centro Cardiologico Monzino  
IRCCS  
Milan, Italy

Michiaki Nagai, MD, PhD  
Department of Internal  
Medicine, General Medicine  
and Cardiology  
Hiroshima City Asa Hospital  
Hiroshima, Japan

Tsukasa Nakamura, MD, PhD  
Division of Nephrology  
Shinmatsudo Central General  
Hospital  
Chiba, Japan

Prabath W.B. Nanayakkara,  
MD, PhD, FRCP  
Department of Clinical  
Neurophysiology  
Amsterdam UMC  
Amsterdam, the Netherlands

Dariusz Naskręt, MD, PhD  
Department of Internal  
Medicine and Diabetology  
Poznan University of Medical  
Sciences  
Poznan, Poland

Mario F. Neves, MD, PhD  
Department of Clinical  
Medicine  
State University of Rio de  
Janeiro  
Rio de Janeiro, Brazil

Pythia T. Nieuwkerk, PhD  
Department of Medical  
Psychology  
Amsterdam UMC- Location  
AMC  
Amsterdam, the Netherlands

Giel Nijpels, MD, PhD  
Department of General Practice  
EMGO Institute for Health and  
Care Research  
VU University Medical Center  
Amsterdam, the Netherlands

Giuseppe D. Norata, PhD  
SISA Center for the Study of  
Atherosclerosis  
Bassini Hospital  
Cinisello Balsamo, Italy  
and  
Department of  
Pharmacological and  
Biomolecular Sciences  
University of Milan  
Milan, Italy

George Ntaios, MD, MSc,  
PhD, FESO  
Department of Medicine  
University of Thessaly  
Larissa, Greece

Ercan Ok, MD  
Nephrology Department  
Ege University School of  
Medicine  
Bornova-Izmir, Turkey

Shuhei Okazaki, MD, PhD  
Department of Neurology  
Osaka University Graduate  
School of Medicine  
Osaka, Japan

Michael H. Olsen, MD, PhD,  
DMSc  
Department of Internal  
Medicine, Holbaek Hospital  
University of Southern  
Denmark  
Odense, Denmark

Alexander N. Orekhov, PhD,  
DSc  
Laboratory of Angiopathology  
Skolkovo Innovation Center  
Moscow, Russia

Aikaterini Papagianni, MD  
University Department of  
Nephrology  
Hippokraton General Hospital  
Thessaloniki, Greece

Hyun-Woong Park, MD  
Department of Internal  
Medicine  
Gyeongsang National  
University Hospital  
Jinju, South Korea

Grace Parraga, PhD  
Department of Medical  
Biophysics  
Western University  
London, Canada

Margaretha Persson, MD  
Department of Clinical Science  
Lund University  
Malmö, Sweden

Matthieu Plichart, MD, PhD  
Paris Cardiovascular Research  
Centre (PARCC)  
University Paris Descartes  
Paris, France  
and  
Assistance Publique  
Hôpitaux de Paris, Hôpital  
Broca  
Paris, France

Joseph F. Polak, MD, MPH  
Tufts University School of  
Medicine  
Tufts Medical Center  
Boston, USA

Holger Poppert, MD, PhD  
Department of Neurology  
Technische Universität  
München  
Munich, Germany

David Preiss, PhD, FRCPath,  
MRCP  
MRC Population Health  
Research Unit, Clinical Trial  
Service Unit, Nuffield  
Department of Population  
Health  
University of Oxford  
Oxford, UK

Jackie F. Price, MD  
Usher Institute  
University of Edinburgh  
Edinburgh, UK

Tadeusz Przewlocki, MD, PhD  
Department of Interventional  
Cardiology  
Collegium Medicum  
Jagiellonian University  
Krakow, Poland

Joel S. Raichlen, MD  
AstraZeneca  
Wilmington, DE, USA

Peter Reaven, MD  
Department of Medicine  
University of Arizona  
Phoenix, USA

Marcus Redaelli, MD  
Department für Humanmedizin  
Universität Witten/Herdecke  
Witten, Germany

Peter Reiss, MD, PhD  
Department of Global Health  
Amsterdam UMC- Location  
AMC  
Amsterdam, the Netherlands  
and  
Amsterdam Institute for Global  
Health and Development  
University of Amsterdam  
Amsterdam, the Netherlands

Kathrin Reuber, MSc  
Department of Neurology  
Goethe University  
Frankfurt am Main, Germany

Martin Röhling, PhD  
Westdeutsches Diabetes- und  
Gesundheitszentrum  
Verbund Katholischer Kliniken  
Düsseldorf  
Düsseldorf, Germany

Emilio Ros, MD, PhD  
Endocrinology & Nutrition  
Service  
Hospital Clínic de Barcelona  
Barcelona, Spain

Signe Rosenlund, MD  
Steno Diabetes Center  
Gentofte, Denmark

Peter Rossing, MD, DMSc  
Steno Diabetes Center  
Gentofte, Denmark

Maria Rosvall, MD, PhD  
Department of Clinical  
Sciences in Malmö  
Lund University  
Malmö, Sweden

Tatjana Rundek, MD, PhD  
Department of Neurology  
University of Miami Miller  
School of Medicine  
Miami, USA

Mohammad Saadatnia, MD  
Al-Zahra Hospital  
Isfahan University of Medical  
Sciences  
Isfahan, Iran

Maya Safarova, MD  
Atherosclerosis Department  
National Medical Research  
Center of Cardiology  
Moscow, Russia

Dirk Sander, MD  
Department of Neurology  
Benedictus Hospital Tutzing &  
Feldafing  
Feldafing, Germany  
and  
Department of Neurology  
Technische Universität  
München  
Munich, Germany

Kerstin Sander, MD, PD  
Department of Psychosomatic  
Berchtesgadener Land,  
Germany

Eiichi Sato, MD  
Division of Nephrology  
Shinmatsudo Central General  
Hospital  
Chiba, Japan

Naveed Sattar, MD, PhD  
BHF Glasgow Cardiovascular  
Research Centre  
University of Glasgow  
Glasgow, UK

Christos Savopoulos, MD, PhD  
1st Propedeutic Department of  
Internal Medicine  
Aristotle University of  
Thessaloniki  
Thessaloniki, Greece

Frank Scheckenbach, MSc,  
PhD  
Department of Neurology  
Goethe University  
Frankfurt am Main, Germany

Caroline Schmidt, PhD  
Wallenberg Laboratory for  
Cardiovascular Research  
University of Gothenburg  
Gothenburg, Sweden

Irene Schmidtman, PhD  
Institut fuer Medizinische  
Biometrie, Epidemiologie und  
Informatik (IMBEI)  
Universitaetsmedizin Mainz  
Mainz, Germany

Ulf Schminke, MD  
Department of Neurology  
Greifswald University Clinic  
Greifswald, Germany

Michael Schneider, MD  
Mannheim Institute for Public  
Health  
Ruprecht-Karls University  
Heidelberg  
Mannheim, Germany  
and  
Dept HR Services & Expertise  
Center  
Boehringer Ingelheim Pharma  
GmbH & Co. KG  
Ingelheim am Rhein, Germany

Lisa Seekircher, DI, Mag., BSc  
Department of Neurology  
Medical University of  
Innsbruck  
Innsbruck, Austria

Norman Sharpe, MD  
Heart Foundation  
Ellerslie, Auckland, New  
Zealand

Andrew Sherwood, PhD  
Department of Psychiatry and  
Behavioral Sciences  
Duke University Medical  
Center  
Durham, NC 27710, USA

Matthias Sitzer, MD  
Department of Neurology  
Klinikum Herford  
Herford, Germany  
and  
Department of Neurology  
Goethe University  
Frankfurt am Main, Germany

Michael Skilton, PhD  
Boden Institute of Obesity,  
Nutrition, Exercise and Eating  
Disorders  
University of Sydney  
Sydney, NSW, Australia

Patrick J. Smith, PhD, MPH  
Department of Psychiatry and  
Behavioral Sciences  
Duke University Medical  
Center  
Durham, NC, USA

Igor A. Sobenin, MD, PhD,  
DSc  
Laboratory of Medical  
Genetics  
Institute of Experimental  
Cardiology, National Medical  
Research Center of Cardiology  
Moscow, Russia  
and  
Laboratory of Angiopathology  
Institute of General Pathology  
and Pathophysiology  
Moscow, Russia

J. David Spence, MD, FRCPC,  
FAHA  
Stroke Prevention &  
Atherosclerosis Research  
Centre  
Western University  
London, Canada

Sathanur R. Srinivasan, PhD  
Center for Cardiovascular  
Health, Department of  
Epidemiology, Biochemistry  
Tulane University School of  
Public Health and Tropical  
Medicine  
New Orleans, USA

Daniel Staub, MD  
Department of Angiology  
University Hospital Basel  
Basel, Switzerland

Coen D. A. Stehouwer, MD,  
PhD, FESC  
Department of Internal  
Medicine and Cardiovascular  
Research Institute Maastricht  
(CARIM)  
Maastricht University Medical  
Centre  
Maastricht, the Netherlands

Helmuth Steinmetz, MD  
Department of Neurology  
Goethe University  
Frankfurt am Main, Germany

Radojica Stolić, MD, PhD  
Department of Internal  
Medicine, Faculty of Medical  
Sciences  
University of Kragujevac  
Kragujevac, Serbia

Erik Stroes, MD, PhD  
Department of Vascular  
Medicine  
Academic Medical Centre,  
University of Amsterdam  
Amsterdam, the Netherlands

Ta-Chen Su, MD, PhD  
Department of Internal  
Medicine  
National Taiwan University  
Hospital  
Taipei, Taiwan

Carmen Suarez, MD, PhD  
Internal Medicine Department  
Universidad Autónoma de  
Madrid  
Madrid, Spain

Michael J. Sweeting, PhD  
Department of Health Sciences  
University of Leicester  
Leicester, UK  
and  
Department of Public Health  
and Primary Care  
University of Cambridge  
Cambridge, UK

Ivan S. Tasić, MD, PhD  
Faculty of Medicine  
University of Niš  
Niš, Serbia  
and  
Institute for Treatment and  
Rehabilitation  
Niška Banja, Serbia

Pieter M. ter Wee, MD, PhD  
Department of Nephrology  
Amsterdam UMC  
Amsterdam, the Netherlands

Rodolphe Thiébaud, MD, PhD  
Centre de Recherche INSERM  
U.897  
Université Victor Segalen  
Bordeaux 2  
Bordeaux Cedex, France

Simon G. Thompson, DSc  
Department of Public Health  
and Primary Care  
University of Cambridge  
Cambridge, UK

Peter L. Thompson, MD,  
FRACP, FACC, MBA  
Heart Research Institute of WA  
and Department of  
Cardiovascular Medicine  
Sir Charles Gairdner Hospital  
Nedlands, Australia

Estefania Toledo, MD, MPH,  
PhD  
Department of Preventive  
Medicine and Public Health  
University of Navarra  
Pamplona, Spain  
and  
Centro de Investigación  
Biomédica en Red-  
Fisiopatología de la Obesidad y  
la Nutrición (CIBERObn)  
Instituto de Salud Carlos III  
(ISCIII)  
Madrid, Spain

Elena Tremoli, PhD  
Centro Cardiologico Monzino  
IRCCS  
Milan, Italy

Devjit Tripathy, MD, PhD  
Division of Diabetes  
University of Texas Health  
Science Center  
San Antonio, USA

Giovanni Tripepi, MSc, PhD  
Clinical Epidemiology and  
Pathophysiology of Renal  
Diseases and Hypertension  
Unit  
Institute of Physiology of the  
National Research Council  
(CNR)  
Reggio Calabria, Italy  
Lena Tschiderer, DI, BSc, PhD  
Department of Neurology  
Medical University of  
Innsbruck  
Innsbruck, Austria

Tomi-Pekka Tuomainen, MD,  
PhD  
Institute of Public Health and  
Clinical Nutrition  
University of Eastern Finland,  
Kuopio Campus  
Kuopio, Finland

Aleksandra Uruska, MD, PhD  
Department of Internal  
Medicine and Diabetology  
Poznan University of Medical  
Sciences  
Poznan, Poland

Heiko Uthoff, MD, PD  
Department of Angiology  
University Hospital Basel  
Basel, Switzerland

Michiel A. van Agtmael, MD,  
PhD  
Department of Internal  
Medicine  
Amsterdam UMC, Vrije  
Universiteit  
Amsterdam, the Netherlands

Wiek van Gilst, PhD  
Department of Experimental  
Cardiology  
University Medical Center  
Groningen  
Groningen, the Netherlands

Gary P. van Guilder, PhD  
Department of Health and  
Nutritional Sciences  
South Dakota State University  
Brookings, South Dakota, USA

Marit G. A. van Vonderen,  
MD, PhD  
Department of Internal  
Medicine  
Medical Center Leeuwarden  
Leeuwarden, the Netherlands

Fabrizio Veglia, PhD  
Centro Cardiologico Monzino  
IRCCS  
Milan, Italy

Frank L. J. Visseren, MD  
Department of Vascular  
Medicine  
University Medical Center  
Utrecht  
Utrecht, the Netherlands

Henry Völzke, MD  
Institute for Community  
Medicine  
SHIP/Clinical-Epidemiological  
Research  
Greifswald, Germany  
and  
German Center for  
Cardiovascular Research  
(DZHK)  
Greifswald, Germany

Ari Voutilainen, PhD  
Institute of Public Health and  
Clinical Nutrition  
University of Eastern Finland,  
Kuopio Campus  
Kuopio, Finland

Kristian Wachtell, MD, PhD,  
DrMedSci  
Department of Cardiology  
Oslo University Hospital  
Oslo, Norway

Matthew Walters, MD, FRCP  
School of Medicine, Dentistry  
and Nursing  
University of Glasgow  
Glasgow, UK

Miao Wang, MD  
Department of Epidemiology  
Beijing Anzhen Hospital,  
Capital Medical University  
Beijing, China



Thapat Wannarong, MD  
Stroke Prevention &  
Atherosclerosis Research  
Centre  
Western University  
London, Canada  
and  
Department of Internal  
Medicine, Faculty of Medicine  
Siriraj Hospital, Mahidol  
University  
Bangkok, Thailand

Gillian Whalley, PhD  
Faculty of Social and Health  
Sciences  
Unitec  
Auckland, New Zealand

Johann Willeit, MD  
Department of Neurology  
Medical University of  
Innsbruck  
Innsbruck, Austria  
Miles D. Witham, BMBCh,  
PhD  
AGE Research Group, NIHR  
Newcastle Biomedical  
Research Centre  
Newcastle University and  
Newcastle-upon-Tyne  
Hospitals Trust  
Newcastle, UK

Wuxiang Xie, MD, PhD  
Department of Epidemiology  
Beijing Anzhen Hospital,  
Capital Medical University  
Beijing, China

Kiyofumi Yamada, MD, PhD  
Departments of Neurosurgery  
Gifu University Graduate  
School of Medicine  
Gifu, Japan

David N. Yanez, PhD  
Department of Biostatistics  
University of Washington  
Seattle, USA

Shinichi Yoshimura, MD, PhD  
Departments of Neurosurgery  
Gifu University Graduate  
School of Medicine  
Gifu, Japan

Wen-Chung Yu, MD  
Division of Cardiology  
Taipei Veterans General  
Hospital  
Taipei, Taiwan  
and  
Institute of Clinical Medicine  
National Yang-Ming  
University  
Taipei, Taiwan

Salim Yusuf, MD, DPhil,  
MRCP  
Department of Medicine and  
Population Health Research  
Institute  
McMaster University  
Hamilton, Ontario, Canada  
and  
Hamilton General Hospital  
Hamilton, Ontario, Canada

Dong Zhao, MD, PhD  
Department of Epidemiology  
Beijing Anzhen Hospital,  
Capital Medical University  
Beijing, China

Zhi-Yong Zou, MD  
Institute of Child and  
Adolescent Health, School of  
Public Health  
Peking University  
Beijing, China

Sophia Zoungas, MD, FRACP,  
PhD  
School of Public Health and  
Preventive Medicine  
Monash University  
Melbourne, Australia

Dorota A. Zozulińska-  
Ziółkiewicz, MD, PhD  
Department of Internal  
Medicine and Diabetology  
Poznan University of Medical  
Sciences  
Poznan, Poland

**Principal investigator of the  
PROG-IMT consortium**

Matthias W. Lorenz, MD, PD  
Department of Neurology  
Goethe University  
Frankfurt am Main, Germany

**Principal investigator of the  
Proof-ATHERO consortium**

Peter Willeit, MD, MPhil, PhD  
Department of Neurology  
Medical University of  
Innsbruck  
Innsbruck, Austria  
and  
Department of Public Health  
and Primary Care  
University of Cambridge  
Cambridge, UK
